# Supplementary material for: Non-Cognitive Specificities of Intellectually Gifted Children and Adolescents: A Systematic Review of the Literature
Source: MDPI journal article supplement (doi:10.3390/jintelligence11070141), 2023-07-15
Supplement: s1 [file s1]

Table S1

*Summary table of methodological aspects and effect sizes from articles on general anxiety.*

| Articles                | Age Range    | Sampling Methodology                                                                                                                          | Sample Size<br>Gifted Group                                                                                                                                                                                                                                                   | Sample Size<br>Non-Gifted Group      | Effect Size and % of<br>Variance Explained                                                                   | Methodological<br>Remarks                                                               |
|-------------------------|--------------|-----------------------------------------------------------------------------------------------------------------------------------------------|-------------------------------------------------------------------------------------------------------------------------------------------------------------------------------------------------------------------------------------------------------------------------------|--------------------------------------|--------------------------------------------------------------------------------------------------------------|-----------------------------------------------------------------------------------------|
| Francis et al.,<br>2018 | 9 - 15 years | Intelligence Test<br>- Verbal IQ<br>- Performance IQ<br>- Fullll-Scale IQ<br>Gr. 1: IQ $\geq$ 130<br>Gr. 2: 115 - 129<br>Gr. 3: IQ $\leq$ 114 | Participants:<br>$N = 312$<br><br>- Verbal IQ<br>Gr. 1: $n = 67$<br>Gr. 2: $n = 127$<br>Gr. 3: $n = 118$<br><br>- Performance IQ<br>Gr. 1: $n = 41$<br>Gr. 2: $n = 106$<br>Gr. 3: $n = 165$<br><br>- Full-Scale IQ<br>Gr. 1: $n = 63$<br>Gr. 2: $n = 137$<br>Gr. 3: $n = 112$ |                                      | Verbal IQ /<br>Intolerance of Uncertainty<br><br>$r = -.17, p < 0.01$<br>3.89% var. explained                | 3 Intelligence<br>Indicators:<br><br>- Verbal IQ<br>- Performance IQ<br>- Full Scale IQ |
| Peyre et al.,<br>2016   | 5 – 6 years  | EDEN Mother-Child<br>Cohort<br>Gr. 1: 70 > IQ<br>Gr. 2: 70 < IQ $\leq$ 120<br>Gr. 3: IQ > 130                                                 | Gr. 3: $n = 23$                                                                                                                                                                                                                                                               | Gr. 1: $n = 19$<br>Gr. 2: $n = 1058$ | Comparison between Group 2<br>and 3 / Emotional Symptoms<br><br>$d = .43, p = .045$<br>4.41 % var. explained | —                                                                                       |

| Articles                | Age Range    | Sampling Methodology                                                                                                                                                     | Sample Size<br>Gifted Group | Sample Size<br>Non-Gifted Group | Effect Size and % of<br>Variance Explained | Methodological<br>Remarks |
|-------------------------|--------------|--------------------------------------------------------------------------------------------------------------------------------------------------------------------------|-----------------------------|---------------------------------|--------------------------------------------|---------------------------|
| Francis et al.,<br>2015 |              |                                                                                                                                                                          |                             |                                 |                                            |                           |
| (M)                     | 5 - 19 years | 18 Studies,<br>6 covering Anxiety<br>- IQ > 120<br>( $90 \leq IQ \leq 110$ in the<br>Non-Gifted Group)<br>OR<br>- IQ used as a<br>continuous variable<br>from 90 to 125+ | —                           | —                               | No Overall Effect Available                | —                         |
| Gauvrit, 2014           |              |                                                                                                                                                                          |                             |                                 |                                            |                           |
| (M)                     | —            | 13 Studies<br>Mixed Designs<br>- IQ<br>- Academic<br>Achievement<br>- Unknown<br>Methodology                                                                             | —                           | —                               | —                                          | —                         |
| Guenolé et al.,<br>2013 | 8 - 12 years | Clinical Population<br>IQ $\geq 130$                                                                                                                                     | $n = 106$                   | Normative data                  | —<br>n.s                                   | No control group.         |

| Articles                                 | Age Range     | Sampling Methodology                                                       | Sample Size<br>Gifted Group | Sample Size<br>Non-Gifted Group | Effect Size and % of<br>Variance Explained                            | Methodological<br>Remarks   |
|------------------------------------------|---------------|----------------------------------------------------------------------------|-----------------------------|---------------------------------|-----------------------------------------------------------------------|-----------------------------|
| Zeidner &<br>Shani-<br>Zinovich,<br>2011 | Grades 10-12  | Gifted Program<br>- IQ<br>- Academic Achievement                           | $n = 374$                   | $n = 428$                       | Group / Anxiety Scale<br>$\eta^2$ partial = .02<br>2 % var. explained | —                           |
| Martin et al.,<br>2010<br><br>(M)        | 5 - 18 years  | 4 Studies devoted<br>to Anxiety<br><br>No Criteria regarding<br>Giftedness | —                           | —                               | Group / Anxiety<br><br>Overall $d = -.72$<br>11.49 % var. explained   | —                           |
| Cross et al.,<br>2008                    | Grade 11-12   | Gifted Program                                                             | $n = 567$                   | Normative data                  | Group / Anxiety Subscale<br>$d = .40$<br>3.84 % var. explained        | No control group.           |
| Cernova, 2005                            | 11 - 15 years | IQ > 129                                                                   | $n = 62$                    | $n = 104$                       | —                                                                     | Unspecified<br>methodology. |
| Pufal-Struzik,<br>1999                   | 16 – 17 years | - Teacher Nomination<br>- Academic Achievement                             | $n = 65$                    | $n = 75$                        | —<br>n.s                                                              | —                           |

| Articles                           | Age Range                                                     | Sampling Methodology                                                                                               | Sample Size<br>Gifted Group | Sample Size<br>Non-Gifted Group | Effect Size and % of<br>Variance Explained                     | Methodological<br>Remarks                                                                                                                            |
|------------------------------------|---------------------------------------------------------------|--------------------------------------------------------------------------------------------------------------------|-----------------------------|---------------------------------|----------------------------------------------------------------|------------------------------------------------------------------------------------------------------------------------------------------------------|
| Czeschlik &<br>Rost, 1994          | —                                                             | $121 \leq IQ \leq 134$                                                                                             | $n = 50$                    | $n = 50$                        | —<br>n.s                                                       | Mixed design with<br>three data sources<br>(children, parents,<br>and teachers) on the<br>children's personality<br>and socio-emotional<br>behavior. |
| Beer, 1991                         | - Junior High<br>School Students<br>- High School<br>Students | Gifted Programs:<br>- Intelligence Scores at<br>the 97th percentile<br>- Academic Scores at the<br>95th percentile | $n = 27$                    | Normative data                  | —                                                              | No control group.                                                                                                                                    |
| Scholwinski &<br>Reynolds,<br>1985 | 7 - 18 years                                                  | Gifted Program<br>$IQ \geq 130$                                                                                    | $n = 584$                   | $n = 4\,923$                    | —                                                              | —                                                                                                                                                    |
| Reynolds &<br>Bradley, 1983        | Grades 1 - 12                                                 | Intelligence Test<br>$IQ \geq 129$                                                                                 | $n = 465$                   | $n = 329$                       | —                                                              | —                                                                                                                                                    |
| Milgram &<br>Milgram, 1976         | Grades 4 - 8                                                  | After School Classes<br>$IQ \geq 135$                                                                              | $n = 182$                   | $n = 310$                       | Gifted scores more favorable<br>than control scores, $p < .01$ | Unspecified<br>methodology.                                                                                                                          |

| Articles                           | Age Range | Sampling Methodology                                            | Sample Size<br>Gifted Group | Sample Size<br>Non-Gifted Group | Effect Size and % of<br>Variance Explained                                                                                                                                                  | Methodological<br>Remarks |
|------------------------------------|-----------|-----------------------------------------------------------------|-----------------------------|---------------------------------|---------------------------------------------------------------------------------------------------------------------------------------------------------------------------------------------|---------------------------|
| Feldhusen &<br>Klausmeier,<br>1962 | —         | Gr. 1: IQ 56 to 81<br>Gr.2: IQ 90 to 110<br>Gr.3: IQ 120 to 146 | $n = 40$ per group          | $n = 40$ per group              | IQ / Anxiety<br>- Gr. 1<br>$r = -.28$ , n.s<br>7.84 % var. explained<br>- Gr. 2<br>$r = -.35$ , $p = .05$<br>12.25 % var. explained<br>- Gr. 3<br>$r = -.07$ , n.s<br>0.49 % var. explained | —                         |

*Note.* — indicates that the information is not available in the article; (M) indicates that the study is a meta-analysis.

Table S2

*Summary table of methodological aspects and effect sizes from articles on test anxiety.*

| Articles                                   | Age Range                                                         | Sampling Methodology                                                                                                                                             | Sample Size<br>Gifted Group | Sample Size<br>Non-Gifted Group | Effect Size and % of<br>Variance Explained                                                                                                                                                                                       | Methodological<br>Remarks                                                                                                                                                                                                         |
|--------------------------------------------|-------------------------------------------------------------------|------------------------------------------------------------------------------------------------------------------------------------------------------------------|-----------------------------|---------------------------------|----------------------------------------------------------------------------------------------------------------------------------------------------------------------------------------------------------------------------------|-----------------------------------------------------------------------------------------------------------------------------------------------------------------------------------------------------------------------------------|
| Zeidner &<br>Schleyer, 1999<br>— Study 1   | Grades 4 - 9                                                      | Gifted Program<br>- IQ<br>- Academic Achievement                                                                                                                 | $n = 772$                   | $n = 716$                       | Non Gifted scored Higher by<br>the order of .28 Standard<br>Deviations                                                                                                                                                           | More information<br>regarding educational<br>style is available in<br>Study 2.                                                                                                                                                    |
| Ackerman &<br>Heggstad,<br>1997<br><br>(M) | 10 years<br>and Above                                             | Data Available for each<br>Indicator<br><br>$g$<br>21 studies,<br>$N = 3\ 027$<br><br>$Gc$<br>21 studies,<br>$N = 4\ 714$<br><br>$Gf$<br>4 studies,<br>$N = 784$ | —                           | —                               | - $g$ / Test Anxiety<br>$\rho = -.33, p < .05$<br>10.89 % var. explained<br>- $Gc$ / Test Anxiety<br>$\rho = -.24, p < .05$<br>5.76 % var. explained<br>- $Gf$ / Test Anxiety<br>$\rho = -.25, p < .05$<br>6.25 % var. explained | - Data are available<br>for each cognitive<br>ability, in addition to<br>general intelligence,<br>$Gf$ and $Gc$ scores.<br><br>- Studies only<br>assessing ability as<br>creativity or<br>psychomotor abilities<br>were excluded. |
| Beer, 1991                                 | - Junior High<br>School Students<br><br>- High School<br>Students | Gifted Programs:<br>- Intelligence Scores at<br>the 97th percentile<br><br>- Academic Scores at the<br>95th percentile                                           | $n = 27$                    | Normative data                  | —                                                                                                                                                                                                                                | No control group.                                                                                                                                                                                                                 |

| Articles                    | Age Range    | Sampling Methodology                      | Sample Size<br>Gifted Group |           | Sample Size<br>Non-Gifted Group                                                                                                                  | Effect Size and % of<br>Variance Explained                                            |
|-----------------------------|--------------|-------------------------------------------|-----------------------------|-----------|--------------------------------------------------------------------------------------------------------------------------------------------------|---------------------------------------------------------------------------------------|
| Hembree,<br>1988<br><br>(M) | —            | 66 Studies<br><br>Giftedness based on IQ  | $N = 9430$                  |           | - Grades 1 and 2<br>$r = -.10, p < .01$<br>1 % var. explained<br><br>- Grades 3 to postsecondary<br>$r = -.23, p < .01$<br>5.29 % var. explained | Data available for IQ,<br>aptitude, achievement<br>(562 studies included<br>overall). |
| Milgram &<br>Milgram, 1976  | Grades 4 - 8 | After School Classes<br><br>IQ $\geq 135$ | $n = 182$                   | $n = 310$ | Gifted scores more<br>favorable than control<br>scores, $p < .001$                                                                               | Unspecified<br>methodology.                                                           |

*Note.* — indicates that the information is not available in the article; (M) indicates that the study is a meta-analysis.

Table S3

*Summary table of methodological aspects and effect sizes from articles on perfectionism.*

| Articles                            | Age Range    | Sampling Methodology                                                                                   | Sample Size<br>Gifted Group | Sample Size<br>Non-Gifted Group | Effect Size and % of<br>Variance Explained                                                                                                                                     | Methodological<br>Remarks                     |
|-------------------------------------|--------------|--------------------------------------------------------------------------------------------------------|-----------------------------|---------------------------------|--------------------------------------------------------------------------------------------------------------------------------------------------------------------------------|-----------------------------------------------|
| Yi & Gentry,<br>2021                | Grades 10-11 | Gifted program based on<br>aptitude tests and<br>creative problem-solving<br>tests in math and science | $n = 180$                   | $n = 263$                       | Academic perfectionism /<br>Giftedness<br><br>NS, especially if the<br>intellectual ability was<br>emphasized for the gifted<br>identification                                 | —                                             |
| Ogurlu, 2020<br><br>(M)             | —            | 14 studies<br><br>Being Identified as<br>Intellectually Gifted                                         | —                           | —                               | - Group/Perfectionistic<br>Concerns<br>$g = -.13$ , n.s<br>0.42 % var. explained<br><br>- Group/Perfectionistic<br>Strivings<br>$g = .19$ , n.s<br>0.90 % var. explained       | All the studies<br>include control<br>groups. |
| Stricker et al.,<br>2019<br><br>(M) | —            | 10 studies<br><br>Being Identified as<br>Intellectually Gifted                                         | $n = 1\,902$                | $n = 2\,438$                    | - Group/Perfectionistic<br>Concerns<br>$g = -.12$ , n.s<br>0.36 % var. explained<br><br>- Group/Perfectionistic<br>Strivings<br>$g = .33$ , $p < .05$<br>2.66 % var. explained | All the studies<br>include control<br>groups. |



| Articles               | Age Range      | Sampling Methodology                                        | Sample Size<br>Gifted Group                                  | Sample Size<br>Non-Gifted Group | Effect Size and % of<br>Variance Explained                                                                                                                                                                                                                                          | Methodological<br>Remarks                                                                                                                                  |
|------------------------|----------------|-------------------------------------------------------------|--------------------------------------------------------------|---------------------------------|-------------------------------------------------------------------------------------------------------------------------------------------------------------------------------------------------------------------------------------------------------------------------------------|------------------------------------------------------------------------------------------------------------------------------------------------------------|
| Guignard et al., 2012  | Grades 5 and 6 | Intelligence Test<br>IQ > 130 or equivalent                 | <i>n</i> = 61                                                | <i>n</i> = 71                   | - Total Scores on CAPS / RCMAS<br>$r = .35, p < .01$<br>12.25 % var. explained<br><br>- Self-Oriented Perfectionism / RCMAS Total<br>$r = .25, p < .01$<br>6.25 % var. explained<br><br>- Socially Prescribed Perfectionism / RCMAS<br>$r = .36, p < .01$<br>12.96 % var. explained | - One of the schools in the sample relies on text comprehension and Cattell's Culture Fair Test.<br><br>- Participants are matched by grade level and age. |
| Stornelli et al., 2009 | Grade 4 or 7   |                                                             | Gifted:<br>$n = 86$<br><br>(Fine art programs,<br>$n = 33$ ) | <i>n</i> = 162                  | Group / Self-oriented perfectionism<br>NS<br><br>Perfectionnism / Reading<br>Gifted: $r = .04$ , ns<br>Control: $r = -.09$ , ns<br><br>Perfectionnism / Mathematics<br>Gifted: $r = .09$ , ns<br>Control: $r = .26, p < .05$                                                        | No information regarding giftedness identification or integration into a special program.                                                                  |
| Roberts & Lovett, 1994 | Grades 7 and 8 | - Pull-out Program for Gifted<br><br>- Academic Achievement | Gifted:<br>$n = 20$<br><br>Achievers:<br>$n = 20$            | <i>n</i> = 20                   | —                                                                                                                                                                                                                                                                                   | Achievers are not identified as gifted or enrolled in special programs                                                                                     |

*Note.* — indicates that the information is not available in the article; (M) indicates that the study is a meta-analysis.

Table S4

*Summary table of methodological aspects and effect sizes from articles on depression.*

| Articles                           | Age Range        | Sampling Methodology                                                                                                                                                                            | Sample Size<br>Gifted Group | Sample Size<br>Non-Gifted Group | Effect Size and % of<br>Variance Explained                                  | Methodological<br>Remarks |
|------------------------------------|------------------|-------------------------------------------------------------------------------------------------------------------------------------------------------------------------------------------------|-----------------------------|---------------------------------|-----------------------------------------------------------------------------|---------------------------|
| Francis et al.,<br>2015<br><br>(M) | 5 - 19 years     | 18 Studies Overall,<br>3 covering Depression<br><br>- IQ > 120<br>( $90 \leq IQ \leq 110$ in the<br>Non-Gifted Group)<br><br>OR<br><br>- IQ used as a<br>continuous variable<br>from 90 to 125+ | —                           | —                               | No Overall Effect Available                                                 | —                         |
| Martin et al.,<br>2010<br><br>(M)  | 5 - 18 years     | 9 Studies Overall,<br>6 covering Depression<br><br>No criteria regarding<br>Giftedness                                                                                                          | —                           | —                               | Group / Depression<br><br>Overall $d = -.17$ , n.s<br>0.72 % var. explained | —                         |
| Cross et al.,<br>2008              | Grades 11 and 12 | Gifted Program                                                                                                                                                                                  | $n = 567$                   | Normative data                  | Group / Depression Subscale<br><br>$d = .49$<br>5.66 % var. explained       | No control group.         |
| Benony, 2007                       | 8 - 13 years     | Gifted Program<br><br>IQ $\geq 130$                                                                                                                                                             | $n = 23$                    | $n = 23$                        | —                                                                           | —                         |

*Note.* — indicates that the information is not available in the article; (M) indicates that the study is a meta-analysis.

Table S5

*Summary table of methodological aspects and effect sizes from articles on suicidal ideation.*

| Articles                      | Age Range                                       | Sampling Methodology                                                                                                                      | Sample Size<br>Gifted Group                                         | Sample Size<br>Non-Gifted Group | Effect Size and % of<br>Variance Explained                        | Methodological<br>Remarks                                                               |
|-------------------------------|-------------------------------------------------|-------------------------------------------------------------------------------------------------------------------------------------------|---------------------------------------------------------------------|---------------------------------|-------------------------------------------------------------------|-----------------------------------------------------------------------------------------|
| Cross et al.,<br>2006         | High School<br>Students                         | Gifted Program                                                                                                                            | $n = 152$                                                           | Normative data                  | —<br>n.s                                                          | No control group.                                                                       |
| Metha &<br>McWhirter,<br>1997 | Grades 7 and 8                                  | Gifted Program                                                                                                                            | $n = 34$                                                            | $n = 38$                        | Group / Suicide Ideation<br>$d = .20$ , n.s<br>1 % var. explained | The Gifted Program<br>integrates high-<br>achieving, creative<br>and talented students. |
| Baker, 1995                   | Junior High School<br>to 11 <sup>th</sup> Grade | Exceptionally Gifted:<br>- Gifted Program<br>based on SAT > 900<br><br>Gifted:<br>- Achievement<br>- Gifted Program<br>based on SAT ≤ 600 | Exceptionally<br>Gifted:<br>$n = 32$<br><br><br>Gifted:<br>$n = 58$ | $n = 56$                        | —<br>n.s                                                          | —                                                                                       |

*Note.* — indicates that the information is not available in the article; (M) indicates that the study is a meta-analysis.

Table S6

*Summary table of methodological aspects and effect sizes from articles on other mood disorders.*

| Articles                | Age Range           | Sampling Methodology                                                                                                              | Sample Size<br>Gifted Group | Sample Size<br>Non-Gifted Group | Effect Size and % of<br>Variance Explained                                                                                                                                                                                                                                                | Methodological<br>Remarks                                                                                |
|-------------------------|---------------------|-----------------------------------------------------------------------------------------------------------------------------------|-----------------------------|---------------------------------|-------------------------------------------------------------------------------------------------------------------------------------------------------------------------------------------------------------------------------------------------------------------------------------------|----------------------------------------------------------------------------------------------------------|
| Cook et al.,<br>2020    | 8 months - 11 years | Longitudinal Community<br>Cohort<br><br>IQ $\geq 120$                                                                             | $n = 192$                   | $n = 1\,015$                    | Group / Clinical Range<br>$d = .59$<br>8 % var. explained<br><br>IQ Score / Mental Health<br>Difficulties Scores<br>$r = -.14, p < .001$<br>1.96 % var. explained<br>(Age 5 and 7)<br>To<br>$r = -.17, p < .001$<br>2.89 % var. explained<br>(Age 11)<br><br>1.96 % Median var. explained | Parents are not<br>informed of child's<br>IQ test results,<br>limiting the gifted<br>labeling influence. |
| MacCabe et<br>al., 2010 | —                   | National School Register<br><br>Academic Achievement<br>(Grade A on National<br>Examination,<br>> 2 Deviations Above<br>the Mean) | $n = 9\,427$                | $n = 704\,449$                  | Grade / Risk Factor for Bipolar<br>Disorder<br><br>Adjusted Hazard Ratio<br>3.34 (1.82–6.11)<br><br>9.92 % * var. explained                                                                                                                                                               | —                                                                                                        |

| Articles               | Age Range      | Sampling Methodology                  | Sample Size<br>Gifted Group | Sample Size<br>Non-Gifted Group | Effect Size and % of<br>Variance Explained                                                                                                                                                  | Methodological<br>Remarks |
|------------------------|----------------|---------------------------------------|-----------------------------|---------------------------------|---------------------------------------------------------------------------------------------------------------------------------------------------------------------------------------------|---------------------------|
| Koenen et al.,<br>2009 | —              | Longitudinale Cohort<br>IQ $\geq$ 115 | $n = 141$                   | $n = 794$                       | Childhood IQ / Prevalence of<br>Psychiatric Disorders<br>$d = .06$ , n.s<br>0.09 % var. explained<br>To<br>$d = 1.28$ , $p < .05$<br>29.05 % var. explained<br>2.12 % Median var. explained | —                         |
| Cross et al.,<br>2008  | Grades 11 - 12 | Gifted Program                        | $n = 567$                   | Normative data                  | Group / Mood Disorders<br>$d = .32$<br>2.5 % var. explained<br>To<br>$d = .76$<br>12.6 % var. explained<br>5.77 % Median var. explained                                                     | —                         |

*Note.* — indicates that the information is not available in the article; (M) indicates that the study is a meta-analysis.

\* This score is approximate because it is based on an odds ratio conversion.

Table S7

*Summary table of methodological aspects and effect sizes from articles on objective indicators of achievement and quality of life.*

| Articles                  | Age Range          | Sampling Methodology                                                                                               | Sample Size<br>Gifted Group | Sample Size<br>Non-Gifted Group | Effect Size and % of<br>Variance Explained                                                                                                                                                                                                                                                                                                                      | Methodological<br>Remarks             |
|---------------------------|--------------------|--------------------------------------------------------------------------------------------------------------------|-----------------------------|---------------------------------|-----------------------------------------------------------------------------------------------------------------------------------------------------------------------------------------------------------------------------------------------------------------------------------------------------------------------------------------------------------------|---------------------------------------|
| Bergold et al.,<br>2020   | Grades 9 and 10    | IQ > 130                                                                                                           | $n = 50$                    | $n = 50$                        | - Gifted Group / Math<br>Achievement Test<br>$r = .66, p < .001$<br>43.56 % var. explained<br><br>- Gifted Group / Reading<br>Comprehension<br>$r = .23, n.s$<br>5.29 % var. explained<br><br>- Gifted Group / Math Grades<br>$r = .81, p < .001$<br>65.61 % var. explained<br><br>- Gifted Group / German<br>Grades<br>$r = .25, n.s$<br>6.25 % var. explained | SES is considered as<br>a covariable. |
| Demetriou et<br>al., 2020 | 10 to 16 years old | Cognitive tasks:<br>- quantitative reasoning,<br>- causal reasoning,<br>- spatial reasoning,<br>- social reasoning | $N = 408$                   |                                 | Cognitive Performance<br>/Academic performance,<br>$r$ between .35 and .42, $p < .001$                                                                                                                                                                                                                                                                          | —                                     |

| Articles               | Age Range         | Sampling Methodology                                                                                                                                    | Sample Size<br>Gifted Group | Sample Size<br>Non-Gifted Group | Effect Size and % of<br>Variance Explained                                                                                                                                                  | Methodological<br>Remarks                         |
|------------------------|-------------------|---------------------------------------------------------------------------------------------------------------------------------------------------------|-----------------------------|---------------------------------|---------------------------------------------------------------------------------------------------------------------------------------------------------------------------------------------|---------------------------------------------------|
| Li & Shi, 2019         | 8 to 11 years old | <ul style="list-style-type: none"> <li>- Gifted program</li> <li>- Stanford-Binet, Weschler</li> <li>- Raven's Standard Progressive Matrices</li> </ul> | $n = 80$                    | $n = 104$                       | Academic performance:<br>Gifted group > Control group<br>Mathematics, $p < 0.001$<br>Chinese, $p < 0.001$<br>English, $p < 0.001$                                                           | —                                                 |
| Wirthwein et al., 2019 | Grades 11 and 12  | Standardized Intelligence Score > 120<br>(Equivalent of IQ > 130)                                                                                       | $n = 97$                    | $n = 97$                        | Gifted Group / School Performance<br>$d = -.63, p < .001$<br>9 % var. explained<br>To<br>$d = -1.02, p < .001$<br>20.62 % var. explained<br>Among Subjects<br>15.65 % Median var. explained | —                                                 |
| Guez et al., 2018      | Grades 6 and 9    | Longitudinal Study<br>Non-Verbal IQ $\geq 126$                                                                                                          | $n = 888$                   | $n = 29\,601$                   | IQ group / Academic Examination<br>$d = .97$<br>19 % var. explained                                                                                                                         | Considering social background and family support. |

| Articles                 | Age Range                                                                         | Sampling Methodology                                                   | Sample Size<br>Gifted Group                                                                                    | Sample Size<br>Non-Gifted Group                                                                                                                                                                    | Effect Size and % of<br>Variance Explained      |
|--------------------------|-----------------------------------------------------------------------------------|------------------------------------------------------------------------|----------------------------------------------------------------------------------------------------------------|----------------------------------------------------------------------------------------------------------------------------------------------------------------------------------------------------|-------------------------------------------------|
| Eklund et al.,<br>2015   | 5 - 12 years                                                                      | Teacher Nomination<br>within Gifted Programs                           | $N = 1\,206$                                                                                                   | Group / Academic Performance<br><br>- Parents ratings<br>partial $\eta^2 = .19, p = .00$<br>19 % var. explained<br><br>- Teacher ratings<br>partial $\eta^2 = .26, p = .00$<br>26 % var. explained | Unspecified<br>methodology<br>regarding groups. |
| Deary et al.,<br>2008    | —                                                                                 | Longitudinal Study                                                     | —                                                                                                              | Hazard ratio for IQ per SD and<br>mortality of 0.80; 95% CI 5<br>0.65–0.99, $p = .037$<br><br>1.51 % * var. explained                                                                              | —                                               |
| Deary et al.,<br>2007    | 11 years and 16<br>years                                                          | Longitudinal Study                                                     | CAT sample<br>$n = 74\,403$<br><br>National Examination<br>$n = 361\,335$                                      | $g$ / Educational Achievement<br>$r = .81$<br>65.61 % var. explained                                                                                                                               | —                                               |
| Strenze, 2007<br><br>(M) | Age at testing from<br>3 to 23 years<br><br>Age at success from<br>20 to 78 years | - Academic<br>performance (GPA or<br>rank)<br><br>- Intelligence tests | Correlation Intelligence / occupation<br>$N = 72,290$<br><br>Correlation Intelligence / income<br>$N = 58,758$ | Intelligence / occupation<br>$r = .37$ (sample size weighted<br>average correlation $r = .36$ )<br><br>Intelligence / income<br>$r = .21$ (sample size weighted<br>average correlation $r = .16$ ) | —                                               |



| Articles                | Age Range | Sampling Methodology | Sample Size<br>Gifted Group                                                 | Sample Size<br>Non-Gifted Group | Effect Size and % of<br>Variance Explained                                                                                                                 | Methodological<br>Remarks |
|-------------------------|-----------|----------------------|-----------------------------------------------------------------------------|---------------------------------|------------------------------------------------------------------------------------------------------------------------------------------------------------|---------------------------|
| Neisser et al.,<br>1996 | —         | —                    | —                                                                           | —                               | - IQ scores / Grades<br>$r = .50$<br>25 % var. explained                                                                                                   | —                         |
|                         |           |                      |                                                                             |                                 | - IQ scores / Years of<br>Education<br>$r = .55$<br>30.25 % var. explained                                                                                 |                           |
| Ree & Earles,<br>1992   | —         | Military Cohorts     | College Graduate Lieutenants<br>$N = 5\,500$<br><br>Airmens<br>$N = 1\,206$ |                                 | $g$ / Job Performance<br><br>- College Graduate Lieutenants<br>$r = .33$<br>10.89 % var. explained<br><br>- Airmens<br>$r = .44$<br>19.36 % var. explained | —                         |

*Note.* — indicates that the information is not available in the article; (M) indicates that the study is a meta-analysis.

\* This score is approximate because it is based on an odds ratio conversion.

Table S8

*Summary table of methodological aspects and effect sizes from articles on life satisfaction and subjective well-being (SWB).*

| Articles                              | Age Range                     | Sampling Methodology                                                                                   | Sample Size<br>Gifted Group | Sample Size<br>Non-Gifted Group | Effect Size and % of<br>Variance Explained                                                                                                                           | Methodological<br>Remarks                                                             |
|---------------------------------------|-------------------------------|--------------------------------------------------------------------------------------------------------|-----------------------------|---------------------------------|----------------------------------------------------------------------------------------------------------------------------------------------------------------------|---------------------------------------------------------------------------------------|
| Guignard et al., 2021                 | Grade 6-10                    | - Labeled as gifted<br>- General intelligence test D48 (Pichot)                                        | $n = 66$                    | $n = 426$                       | Labelled gifted and non-labelled:<br>$NS$ on school life satisfaction<br>$t(490) = -.17, p = .87$<br><br>School life satisfaction/D48<br>$r = .089, p = .049$        | Labelled as gifted and D48 failed to reach significance ( $\chi^2 = 3.82, p = .051$ ) |
| Bergold et al., 2020                  | Grade 9-10                    | Cultural Fair Intelligence Test Scale 2<br><br>Gifted IQ > 130<br><br>Average ability<br>85 < IQ < 115 | $n = 50$                    | $n = 50$                        | Gifted > Control:<br>Mathematics achievement test,<br>$p < .001$<br>$NS$ in reading comprehension and German grade<br><br>Giftedness / Subjective Well-Being<br>$NS$ | —                                                                                     |
| Zeidner, 2020<br><br>(M)              | Primary School to High School | 6 Studies                                                                                              | —                           | —                               | Group / SWB<br><br>Summary effect $g = -.01$ ,<br>(min $d = -.54$ ; max $d = -.03$ )<br>0.0 % var. explained                                                         | All studies included control groups and allowed calculation of effect sizes.          |
| Pontes de França-Freitas et al., 2019 | 8 - 12 years                  | Centers for the Development of Potential and Talent                                                    | $n = 269$                   | $n = 125$                       | —                                                                                                                                                                    | —                                                                                     |

| Articles                          | Age Range                                                                                             | Sampling Methodology                                                   | Sample Size<br>Gifted Group | Sample Size<br>Non-Gifted Group | Effect Size and % of<br>Variance Explained                                                                                                                                                                                                                | Methodological<br>Remarks  |
|-----------------------------------|-------------------------------------------------------------------------------------------------------|------------------------------------------------------------------------|-----------------------------|---------------------------------|-----------------------------------------------------------------------------------------------------------------------------------------------------------------------------------------------------------------------------------------------------------|----------------------------|
| Bücker et al.,<br>2018<br><br>(M) | —                                                                                                     | 47 Studies                                                             |                             | $N = 38\,946$                   | Academic Achievement /<br>Subjective Well-Being<br><br>Overall $r = .16$ ,<br>(Coded Effect Sizes ranging<br>from $r = -.47$ to $r = .68$ )<br>2.6 % var. explained                                                                                       | —                          |
| Cheng &<br>Furnham,<br>2014       | Intelligence at age<br>11<br><br>Educational<br>achievement and<br>occupational<br>prestige at age 50 | General ability test<br><br>(40 verbal and 40 non-<br>verbal items)    |                             | $N = 5,090$                     | Verbal Ability / Education,<br>$r = .426, p < .05$<br>Non-verbal Ability / Education,<br>$r = .402, p < .05$<br>Verbal Ability /<br>Occupational prestige,<br>$r = .32, p < .05$<br>Non-verbal Ability /<br>Occupational prestige,<br>$r = .305, p < .05$ | —                          |
| Chmiel et al.,<br>2012            | End of Primary<br>School,<br>Mostly Grade 6                                                           | Longitudinal Study                                                     |                             | $N = 738$                       | Prediction of SWB component /<br>General Cognitive Ability<br><br>$\beta = .04$<br>0.16 % var. explained                                                                                                                                                  | —                          |
| Huebner &<br>Alderman,<br>1993    | Grades 2 - 9                                                                                          | - Initial Psychological<br>Evaluations<br>OR<br>- 3-year reevaluations |                             | $N = 53$                        | SLSS / IQ<br><br>$r = -.08, n.s.$ ,<br>0.64 % var. explained                                                                                                                                                                                              | Include data about<br>SES. |

Note. — indicates that the information is not available in the article; (M) indicates that the study is a meta-analysis.

Table S9

*Summary table of methodological aspects and effect sizes from articles on socialization.*

| Articles               | Age Range           | Sampling Methodology                 | Sample Size<br>Gifted Group | Sample Size<br>Non-Gifted Group | Effect Size and % of<br>Variance Explained                                                                                                                                                                                                                                                                                                                                                  | Methodological<br>Remarks                                                                    |
|------------------------|---------------------|--------------------------------------|-----------------------------|---------------------------------|---------------------------------------------------------------------------------------------------------------------------------------------------------------------------------------------------------------------------------------------------------------------------------------------------------------------------------------------------------------------------------------------|----------------------------------------------------------------------------------------------|
| Cook et al.,<br>2020   | 8 months - 11 years | Longitudinal Cohort<br>IQ $\geq$ 120 | $n = 192$                   | $n = 1\,015$                    | —                                                                                                                                                                                                                                                                                                                                                                                           | Parents are not informed of child's IQ test results, limiting the gifted labeling influence. |
| Peairs et al.,<br>2019 | Grades 6 - 12       | Academic Achievement                 | $n = 141$                   | $n = 186$                       | <p>- Achievement / Behavioral Adjustment Measures</p> <p>partial <math>r = -.04</math>, <i>n.s</i><br/>0.16 % var. explained</p> <p>To</p> <p>partial <math>r = -.24</math>, <math>p &lt; .001</math><br/>5.76 % var. explained<br/>3.62 % Median var. explained</p> <p>- Achievement / Perceived Popularity</p> <p>partial <math>r = -.08</math>, <i>n.s</i><br/>0.64 % var. explained</p> | Socioeconomic status as controlled variable.                                                 |
| Ryoo et al.,<br>2017   | Grades 5 - 9        | Longitudinal Study<br>IQ $\geq$ 130  | $n = 299$                   | $n = 689$                       | —<br><i>n.s</i>                                                                                                                                                                                                                                                                                                                                                                             | Gifted students spent most of their time in general education classrooms.                    |

| Articles               | Age Range          | Sampling Methodology                                                                                    | Sample Size<br>Gifted Group | Sample Size<br>Non-Gifted Group      | Effect Size and % of<br>Variance Explained                                                                                                     | Methodological<br>Remarks                       |
|------------------------|--------------------|---------------------------------------------------------------------------------------------------------|-----------------------------|--------------------------------------|------------------------------------------------------------------------------------------------------------------------------------------------|-------------------------------------------------|
| Peyre et al.,<br>2016  | 5 - 6 years        | EDEN mother-child<br>Cohort<br><br>Gr. 1: $70 < IQ$<br>Gr. 2 : $70 < IQ \leq 120$<br>Gr. 3 : $IQ > 130$ | Gr. 3: $n = 23$             | Gr. 1: $n = 19$<br>Gr. 2: $n = 1058$ | Groups 2 and 3 / Total SDQ<br>$d = .43, p = .045$<br>4.41 % var. explained                                                                     | —                                               |
| Eklund et al.,<br>2015 | 5 years - 12 years | Teacher Nomination<br>within Gifted Programs                                                            | $N = 1\,206$                |                                      | Group / EBR<br><br>- Parents<br>$r = -.05, p = .04$<br>0.25 % var. explained<br><br>- Teachers<br>$r = -.13, p = .00$<br>1.69 % var. explained | Unspecified<br>methodology<br>regarding groups. |

| Articles               | Age Range      | Sampling Methodology                                                            | Sample Size<br>Gifted Group | Sample Size<br>Non-Gifted Group | Effect Size and % of<br>Variance Explained                                                                                                                                                                                                                                                                                                                                                                                                                                                                                                                                                                                                                               | Methodological<br>Remarks                                                                                                                                                                                                                                                                                                                                                                                                                        |
|------------------------|----------------|---------------------------------------------------------------------------------|-----------------------------|---------------------------------|--------------------------------------------------------------------------------------------------------------------------------------------------------------------------------------------------------------------------------------------------------------------------------------------------------------------------------------------------------------------------------------------------------------------------------------------------------------------------------------------------------------------------------------------------------------------------------------------------------------------------------------------------------------------------|--------------------------------------------------------------------------------------------------------------------------------------------------------------------------------------------------------------------------------------------------------------------------------------------------------------------------------------------------------------------------------------------------------------------------------------------------|
| Košir et al.,<br>2015  | 11 - 15 years  | Gifted Program<br>- Teachers' ratings<br>- IQ > 120<br>- Creativity             | <i>n</i> = 85               | <i>n</i> = 319                  | Analyses comparing gifted /<br>control groups<br><br>Group / Social Acceptance<br>Partial $\eta^2 = .032, p = .005$<br>3.22 % var. explained<br><br>Group / Negative nominations<br>Partial $\eta^2 = .016, p = .01$<br>1.6 % var. explained<br><br>Group / Social Impact<br>Partial $\eta^2 = .012, p = .031$<br>1.2 % var. explained<br><br>Group / Self-concept<br>Partial $\eta^2 = .107, p < .001$<br>10.7 % var. explained<br><br>- Academic self-concept<br>Partial $\eta^2 = .074, p = .074$<br>7.4 % var. explained<br><br>- General self-concept<br>Partial $\eta^2 = .015, p = .013$<br>1.5 % var. explained<br><br>- Peer relations self-concept <i>n.s.</i> | Inclusion criteria<br>within gifted<br>programs lead to 26%<br>of students being<br>identified as gifted in<br>the country where the<br>study was conducted.<br><br>52% of the gifted<br>participants were<br>identified only on the<br>basis of teacher<br>assessment.<br><br>Means and standard<br>deviations are given<br>for gifted participants<br>identified on the basis<br>of an intelligence test<br>and those assessed by<br>teachers. |
| Masden et al.,<br>2015 | Grades 7 and 8 | 60 Pairs of<br>Friendship Dyads<br><br>Gifted Program<br>- Academic Achievement | <i>n</i> = 81               | <i>n</i> = 39                   | - Group / Psychosocial<br>Competency<br>$\beta = .23,$<br>Semi-Partial $r^2 = .05, p < .05$<br>5.29 % var. explained<br><br>- Group / Friendship Quality<br>$\beta = -.24, sr^2 = .03, p < .01$<br>5.76 % var. explained                                                                                                                                                                                                                                                                                                                                                                                                                                                 | —                                                                                                                                                                                                                                                                                                                                                                                                                                                |

| Articles                                 | Age Range      | Sampling Methodology                                           | Sample Size<br>Gifted Group                                                                                 | Sample Size<br>Non-Gifted Group | Effect Size and % of<br>Variance Explained                                                                                                                                                                         | Methodological<br>Remarks                                                                                                                                                      |
|------------------------------------------|----------------|----------------------------------------------------------------|-------------------------------------------------------------------------------------------------------------|---------------------------------|--------------------------------------------------------------------------------------------------------------------------------------------------------------------------------------------------------------------|--------------------------------------------------------------------------------------------------------------------------------------------------------------------------------|
| Zeidner &<br>Shani-<br>Zinovich,<br>2015 | Grades 10 - 12 | Gifted Programs<br>- IQ<br>- Academic Achievement              | $n = 374$                                                                                                   | $n = 428$                       | Group / Social Self-Concept<br>Partial $\eta^2 = .02, p < .01$<br>2 % var. explained                                                                                                                               | —                                                                                                                                                                              |
| Shechtman &<br>Silektor, 2012            | Grades 5 - 12  | Gifted Programs<br>- Segregated Classes<br>- Pull-out Programs | $n = 508$<br>including<br>- $n = 330$ in<br>Segregated<br>Classrooms<br>- $n = 178$ in<br>Pull-out Programs | $n = 466$                       | - Groups / School level /<br>Total Score on ICQ<br>$\eta^2 = .01, p < .05$<br>1 % var. explained<br><br>- Groups / School level /<br>Total score on Assertiveness<br>$\eta^2 = .02, p < .05$<br>2 % var. explained | —                                                                                                                                                                              |
| Simoes<br>Loureiro et al.,<br>2010       | 7 - 11 years   | Clinical population<br>IQ > 125                                | $n = 45$                                                                                                    | $n = 30$                        | —                                                                                                                                                                                                                  | —                                                                                                                                                                              |
| López et al.,<br>2009                    | 4 - 17 years   | IQ $\geq 130$                                                  | $n = 50$                                                                                                    | $n = 50$                        | Group / Self-concept<br>Subscale Level of anxiety<br>Partial $\eta^2 = .048, p < .05$<br>4.8 % var. explained                                                                                                      | No information was<br>provided regarding<br>the sampling method.<br><br>The instrument used<br>to measure IQ was an<br>outdated version of<br>the Wechsler scales<br>(WISC-R). |

| Articles                 | Age Range      | Sampling Methodology                                                                 | Sample Size<br>Gifted Group                                                                                             | Sample Size<br>Non-Gifted Group | Effect Size and % of<br>Variance Explained | Methodological<br>Remarks                                                                               |
|--------------------------|----------------|--------------------------------------------------------------------------------------|-------------------------------------------------------------------------------------------------------------------------|---------------------------------|--------------------------------------------|---------------------------------------------------------------------------------------------------------|
| Vialle et al.,<br>2007   | Grades 7 and 8 | Academic Achievement                                                                 | $n = 65$                                                                                                                | $n = \text{Unspecified}$        | —                                          | Unspecified methodology.                                                                                |
| Bain & Bell,<br>2004     | Grades 4 - 6   | Gifted Program<br>- Academic achievement<br>- IQ<br>- Teachers' ratings              | $n = 26$                                                                                                                | $n = 67$                        | —                                          | Participants in the control group were high achievers, including $n = 38$ enrolled in a gifted program. |
| Richards et al.,<br>2003 | Grades 7 - 10  | $\text{IQ} \geq 127$                                                                 | $n = 33$                                                                                                                | $n = 25$                        | —                                          | Use different ability tests to calculate participants IQ scores in the same gifted group.               |
| Gallucci et al.,<br>1999 | 12 - 16 years  | - Summer Program for the Gifted<br>- Scholar Gifted Program<br><br>$\text{IQ} > 130$ | Gifted: $N = 78$<br><br>Gifted from the summer program:<br>$n = 44$<br><br>Gifted from the scholar program:<br>$n = 34$ | $n = 62$                        | —<br>n.s                                   | —                                                                                                       |



| Articles                  | Age Range               | Sampling Methodology                                                                                                                                                 | Sample Size<br>Gifted Group                                          | Sample Size<br>Non-Gifted Group | Effect Size and % of<br>Variance Explained                                        | Methodological<br>Remarks |
|---------------------------|-------------------------|----------------------------------------------------------------------------------------------------------------------------------------------------------------------|----------------------------------------------------------------------|---------------------------------|-----------------------------------------------------------------------------------|---------------------------|
| Garland &<br>Zigler, 1999 | Mostly Grades 9         | Summer Program for the<br>Gifted, based on SAT                                                                                                                       | $n = 191$                                                            | Normative data                  | —                                                                                 | No control group.         |
| Norman et al.,<br>1999    | Grades 6 - 8            | Summer Program for the<br>Gifted<br>- $IQ \geq 125$<br>- Achievement Criterion<br><br>Highly Gifted: School<br>Ability Index $> 132$<br>Gifted: $116 < SAI \leq 132$ | Highly Gifted:<br>$n = 74$<br><br>Moderately<br>Gifted:<br>$n = 163$ | Normative data                  | —<br>n.s                                                                          | No control group.         |
| Field et al.,<br>1998     | High School<br>Freshmen | Gifted Program<br>based on $IQ \geq 132$                                                                                                                             | $n = 62$                                                             | $n = 162$                       | —                                                                                 | —                         |
| Swiatek, 1995             | Grades 7 - 10           | Summer Program<br>for the Gifted                                                                                                                                     | $n = 210$                                                            | —                               | Ability level / Deny Giftedness<br>Strategy<br>$d = .64$<br>9.30 % var. explained | No control group.         |

| Articles                  | Age Range     | Sampling Methodology                                                                                                             | Sample Size<br>Gifted Group                                               | Sample Size<br>Non-Gifted Group | Effect Size and % of<br>Variance Explained                                                                                                                     | Methodological<br>Remarks |
|---------------------------|---------------|----------------------------------------------------------------------------------------------------------------------------------|---------------------------------------------------------------------------|---------------------------------|----------------------------------------------------------------------------------------------------------------------------------------------------------------|---------------------------|
| Cohen et al.,<br>1994     | Grades 4 - 6  | Gifted Pull-out Program<br>- Academic achievement<br>- IQ > 127                                                                  | $n = 53$                                                                  | $n = 149$                       | —                                                                                                                                                              | —                         |
| Czeschlik &<br>Rost, 1994 |               | $121 \leq IQ \leq 134$                                                                                                           | $n = 50$                                                                  | $n = 50$                        | Group / Perceived Socialization<br>$d = .48$<br>5.43 % var. explained                                                                                          | —                         |
| Daubert &<br>Benbow, 1990 | 13 years      | Achievement<br><br>Highly Gifted:<br>SAT-M $\geq 700$<br>SAT-V $\geq 630$<br><br>Moderately Gifted:<br>SAT-M + SAT-V $\leq 540$  | Highly Gifted:<br>$n = 300$<br><br>Moderately<br>Gifted:<br><br>$n = 111$ | —                               | Group / Social Abilities<br>$r = .58, p < .001$<br>33.64 % var. explained<br>To<br>$r = .67, p < .001$<br>44.89 % var. explained<br>36 % Median var. explained | No control group.         |
| Gallucci, 1988            | 12 - 16 years | - Summer Program for<br>the Gifted<br><br>- Scholar Gifted Program<br>Highly Gifted: IQ > 150<br><br>Gifted: $135 < IQ \leq 140$ | Highly Gifted:<br>$n = 49$<br><br>Moderately<br>Gifted:<br><br>$n = 34$   | Normative data                  | —<br>n.s                                                                                                                                                       | No control group.         |

| Articles                     | Age Range                                                 | Sampling Methodology                                                                                                           | Sample Size<br>Gifted Group                                           | Sample Size<br>Non-Gifted Group | Effect Size and % of<br>Variance Explained                                | Methodological<br>Remarks                                                             |
|------------------------------|-----------------------------------------------------------|--------------------------------------------------------------------------------------------------------------------------------|-----------------------------------------------------------------------|---------------------------------|---------------------------------------------------------------------------|---------------------------------------------------------------------------------------|
| Brody &<br>Benbow, 1986      | Grades 7 and 8                                            | Achievement<br>Highly Gifted:<br>SAT-M $\geq 700$<br>SAT-V $\geq 630$<br>Moderately Gifted:<br>SAT-M + SAT-V $\leq 540$        | Highly Gifted:<br>$n = 300$<br><br>Moderately<br>Gifted:<br>$n = 111$ | —                               | Group / Social Abilities<br>$f = .44, p < .001$<br>16.24 % var. explained | No control group.                                                                     |
| Janos &<br>Robinson,<br>1985 | —                                                         | Newspapers Publicity<br>and Self-Selected<br>Volunteers<br><br>Highly Gifted: IQ $> 163$<br>Gifted: $120 < \text{IQ} \leq 140$ | Highly Gifted:<br>$n = 32$<br><br>Moderately<br>Gifted: $n = 27$      | —                               | —                                                                         | No control group.                                                                     |
| Lehman &<br>Erdwins, 1981    | Grades 3<br>(and Grades 6 for<br>the Non-Gifted<br>Group) | Gifted Program<br>$141 \leq \text{IQ} \leq 165$                                                                                | $n = 16$                                                              | $n = 32$                        | —                                                                         | Principals'<br>nomination of<br>participants included<br>in the non-gifted<br>groups. |
| Milgram &<br>Milgram, 1976   | Grades 4 - 8                                              | Gifted Program<br>- After School Classes<br><br>IQ $\geq 135$                                                                  | $n = 182$                                                             | $n = 310$                       | —                                                                         | —                                                                                     |

*Note.* — indicates that the information is not available in the article; (M) indicates that the study is a meta-analysis.

Table S10

*Summary table of methodological aspects and effect sizes from articles on self-esteem (SE).*

| Articles                   | Age Range   | Sampling Methodology                                                        | Sample Size<br>Gifted Group | Sample Size<br>Non-Gifted Group | Effect Size and % of<br>Variance Explained                                                                                                          | Methodological<br>Remarks                            |
|----------------------------|-------------|-----------------------------------------------------------------------------|-----------------------------|---------------------------------|-----------------------------------------------------------------------------------------------------------------------------------------------------|------------------------------------------------------|
| Casino-García et al., 2021 | 8-18 years  | Gifted identified by licensed psychologist                                  | $n = 118$                   | $n = 122$                       | Gifted students SE scores < non-identified peers scores,<br>$p = .03$                                                                               | —                                                    |
| Fanaj & Mustafa, 2021      | 13-19 years | Nominated as gifted by teachers                                             | $n = 960$                   | $n = 649$                       | —<br>n.s                                                                                                                                            | —                                                    |
| Papadopoulos, 2021         | 5-6 years   | IQ > 120                                                                    | $N = 108$                   |                                 | IQ/global SE,<br>$r = .201, p < .05$<br>4.04% var. explained<br><br>Scholastic competence/global SE,<br>$r = .214, p < .05$<br>4.58% var. explained | —                                                    |
| Bakar, 2020                | 12-17 years | - National Gifted and Talented Center,<br>University of Kebangsaan Malaysia | $N = 194$                   |                                 | —<br>n.s                                                                                                                                            | Gifted and Talented students have medium to high SE. |

| Articles           | Age Range            | Sampling Methodology                                                                                    | Sample Size<br>Gifted Group | Sample Size<br>Non-Gifted Group | Effect Size and % of<br>Variance Explained                                                                                                                                                                                                                                                            | Methodological<br>Remarks |
|--------------------|----------------------|---------------------------------------------------------------------------------------------------------|-----------------------------|---------------------------------|-------------------------------------------------------------------------------------------------------------------------------------------------------------------------------------------------------------------------------------------------------------------------------------------------------|---------------------------|
| Moyano et al, 2020 | 6-9 years            | Academic performance<br>was evaluated with the<br>average Grades                                        | $N = 133$                   |                                 | - SE is a predictor of<br>academic performance<br>$\beta = 0.403, p < 0.001$<br><br>- SE/academic Math<br>$r = .32, p < .001$<br>10.24% var. explained<br><br>- SE/academic language<br>$r = .32, p < .001$<br>10.24% var. explained<br><br>- SE/reasoning $r = .21, p < .05$<br>4.41% var. explained | —                         |
| Li & Shi, 2019     | 8 to 11 years<br>old | - Gifted program<br><br>- Stanford-Binet,<br>Weschler<br><br>- Raven's Standard<br>Progressive Matrices | $n = 80$                    | $n = 104$                       | Gifted SE scores<br><br>> Control group SE scores,<br><br>$t = 2.50, p = 0.013$                                                                                                                                                                                                                       | —                         |
| Yang et al., 2019  | Grades 3-5           | Academic achievement :<br>scores in Chinese, Math,<br>and English                                       | $N = 779$                   |                                 | SE / achievement<br><br>$r = .23$ to $r = .30$<br><br>From 5.29% to 9% var.<br>explained                                                                                                                                                                                                              | —                         |

| Articles                        | Age Range    | Sampling Methodology                                                                                      | Sample Size<br>Gifted Group | Sample Size<br>Non-Gifted Group | Effect Size and % of<br>Variance Explained                                                                                                                                                                                                                                   | Methodological<br>Remarks |
|---------------------------------|--------------|-----------------------------------------------------------------------------------------------------------|-----------------------------|---------------------------------|------------------------------------------------------------------------------------------------------------------------------------------------------------------------------------------------------------------------------------------------------------------------------|---------------------------|
| Giofrè et al., 2017             | Grades 6-8   | - Cattell Culture Fair<br>Intelligence Test<br>- INVALSI test                                             | $N = 159$                   |                                 | - Indirect effect of SE on<br>mathematic $\beta = .155, p = .033$ ;<br>overall effect of SE on<br>mathematic $\beta = .317, p < .001$<br><br>- Indirect effect of SE on<br>reading $\beta = .118, p = .033$ ;<br>overall effect of SE on reading<br>$\beta = .588, p < .001$ | —                         |
| Tetzner et al., 2017            | Grades 7–10  | Scholastic achievement in<br>Mathematics, English and<br>physics                                          | $N = 7977$                  |                                 | Academic achievement / SE<br>$r$ between .23 and .41, $p < .001$<br>From 5.29% to 16.81% var.<br>explained<br><br>Higher academic achievement<br>predict higher SE,<br>but not vice versa                                                                                    | Longitudinal study        |
| Preckel et al., 2016            | Grades 10-12 | - Gifted summer school<br>(based on scholastic<br>achievement, motivation<br>and engagement)              | $n = 177$                   | —                               | Not significant evolution of SE<br>aver time                                                                                                                                                                                                                                 | No control group.         |
| Topçu & Leana<br>Tascilar, 2016 | Grades 4-8   | After-school program for<br>gifted students or public<br>special education school<br>for gifted students. | $n = 184$                   | —                               | General SE explained 5% of<br>achievement in fourth Grades<br>and academic SE 9%.                                                                                                                                                                                            | No control group.         |

| Articles                  | Age Range                           | Sampling Methodology                                                                                                                                                                               | Sample Size<br>Gifted Group                     | Sample Size<br>Non-Gifted Group | Effect Size and % of<br>Variance Explained                                                                                                                                                                                   | Methodological<br>Remarks |
|---------------------------|-------------------------------------|----------------------------------------------------------------------------------------------------------------------------------------------------------------------------------------------------|-------------------------------------------------|---------------------------------|------------------------------------------------------------------------------------------------------------------------------------------------------------------------------------------------------------------------------|---------------------------|
| Kaya & Ogurlu,<br>2015    | Middle school<br>students           | - Raven Standard<br>Progressive Matrices<br><br>- GPA                                                                                                                                              | $N = 127$                                       |                                 | No significant relationship<br>between SE and intelligence                                                                                                                                                                   | —                         |
| Diseth et al., 2014       | Grades 6 and<br>8                   | Grades in mathematics,<br>Norwegian and English                                                                                                                                                    | $N = 2062$                                      |                                 | Accademic achievement level<br>correlated positively with SE,<br>$r = .25, p < .01$<br>6.25% var. explained                                                                                                                  | —                         |
| Di Giunta et al.,<br>2013 | Junior and<br>senior high<br>school | - Academic achievement<br>at the end of the junior<br>high school (8th Grades)<br>assessed by their teacher<br><br>- Academic performance<br>at the end of the senior<br>high school (self-report) | $N = 426$                                       |                                 | Junior high-school Grades/SE<br>$r$ between .16 and .20, $p < .05$<br>From 2.56% to 4 % var.<br>explained<br><br>Senior high-school Grades/SE<br>$r$ between .16 and .17, $p < .05$<br>From 2.56% to 2.89% var.<br>explained | —                         |
| Foley-Nicpon,<br>2012     | 6-18                                | IQ > 120                                                                                                                                                                                           | $n = 112$<br>54 diagnostic<br>criteria for ADHD | Normative data                  | Gifted with ADHD had lower<br>scores on measures of SE                                                                                                                                                                       | No control group.         |
| Zuffianò et al.,<br>2012  | Grade 8                             | - Cultural-Fair<br>Intelligence Test                                                                                                                                                               | $N = 170$                                       |                                 | SE uncorrelated with academic<br>achievement                                                                                                                                                                                 | —                         |

| Articles                        | Age Range                                   | Sampling Methodology                                               | Sample Size<br>Gifted Group                                                             | Sample Size<br>Non-Gifted Group | Effect Size and % of<br>Variance Explained                                                                                                                                                                                                                                                       | Methodological<br>Remarks |
|---------------------------------|---------------------------------------------|--------------------------------------------------------------------|-----------------------------------------------------------------------------------------|---------------------------------|--------------------------------------------------------------------------------------------------------------------------------------------------------------------------------------------------------------------------------------------------------------------------------------------------|---------------------------|
| Courtinat-Camps<br>et al., 2011 | 9-15 years                                  | IQ > 130                                                           | $n = 255$<br>204 enrolled in<br>homogeneous<br>groups, 51 in<br>heterogeneous<br>groups | —                               | Gifted SE in homogeneous<br>grouping < Gifted SE in<br>heterogeneous grouping<br>$p < .01$ , $\eta^2 = .055$                                                                                                                                                                                     | —                         |
| Marsh & O'Mara,<br>2008         | Grade 10 to<br>post-<br>graduation          | Longitudinal study<br><br>National Youth in<br>Transition database |                                                                                         |                                 | —<br>n.s.<br><br>only the path from T2 self-<br>esteem to T3 school Grades<br>(.07) is marginally significant                                                                                                                                                                                    | —                         |
| Pullmann & Allik,<br>2008       | Grades 2-12<br>and university<br>applicants | Academic achievement<br>measured through GPA                       | $N = 4572$                                                                              |                                 | SE / Academic achievement<br>from $r = .28$ up to $.42$ ( $p < .001$ )<br>from 2 <sup>nd</sup> Grades to 6 <sup>th</sup> Grades<br>and decline rapidly afterwards<br>to not significant for 12 <sup>th</sup><br>Grades and university<br>applicants<br><br>From 7.84 to 17.64% var.<br>explained | —                         |
| Benony et al., 2007             | 8-13 years                                  | IQ > 130                                                           | $n = 23$                                                                                | $n = 23$                        | —                                                                                                                                                                                                                                                                                                | —                         |



| Articles                  | Age Range             | Sampling Methodology                              | Sample Size<br>Gifted Group | Sample Size<br>Non-Gifted Group | Effect Size and % of<br>Variance Explained                                                                                                                                             | Methodological<br>Remarks                                                                                    |
|---------------------------|-----------------------|---------------------------------------------------|-----------------------------|---------------------------------|----------------------------------------------------------------------------------------------------------------------------------------------------------------------------------------|--------------------------------------------------------------------------------------------------------------|
| Ghobary & Hejazi,<br>2007 | Middle school         | IQ > 130                                          | $n = 60$                    | $n = 60$                        | SE / Academic achievement<br>$r = .36, p < .005$<br>for gifted students<br>12.96 % var. explained<br>$r = .14, n.s$ for regular students<br>Gifted group > control group,<br>$p < .05$ | For the authors,<br>correlation<br>coefficients are<br>interpreted as large<br>when they<br>approximate .30. |
| Vialle et al., 2007       | Secondary<br>students | Top 10% of Student in the<br>ELLA and SNAP scores | $n = 65$                    | $n = \sim 800$                  | SE unrelated to academic<br>Grades for gifted students                                                                                                                                 | —                                                                                                            |
| Marsh & Craven,<br>2006   |                       |                                                   |                             |                                 |                                                                                                                                                                                        | Review of the<br>litterature                                                                                 |
| Vialle et al., 2005       | Secondary<br>student  | Top 10% of Student in the<br>ELLA and SNAP scores | $n = 65$                    | $n = \sim 800$                  | No differences in measured SE<br>between gifted and non-gifted<br>students.<br>No correlation between SE and<br>academic achievement for the<br>gifted group $r = .02$ (ns)            | —                                                                                                            |

| Articles                 | Age Range                        | Sampling Methodology                                                                                                                                                                                                                                         | Sample Size<br>Gifted Group | Sample Size<br>Non-Gifted Group | Effect Size and % of<br>Variance Explained                                                                                                                                                                                                                                                                                                                               | Methodological<br>Remarks                  |
|--------------------------|----------------------------------|--------------------------------------------------------------------------------------------------------------------------------------------------------------------------------------------------------------------------------------------------------------|-----------------------------|---------------------------------|--------------------------------------------------------------------------------------------------------------------------------------------------------------------------------------------------------------------------------------------------------------------------------------------------------------------------------------------------------------------------|--------------------------------------------|
| Adams-Byers et al., 2004 | Grades 5-11                      | <ul style="list-style-type: none"> <li>- Summer programs for gifted and talented youth</li> <li>- IQ &gt; 124 (Grades 4-6)</li> <li>- SAT verbal &gt; 430, SAT Math &gt; 500 (Grades 6-8)</li> <li>- SAT Verbal and Math &gt; 500 (Grades 9 – 12)</li> </ul> | $n = 44$                    | —                               | —                                                                                                                                                                                                                                                                                                                                                                        | Qualitative study<br><br>No control group. |
| Baumeister et al., 2003  |                                  |                                                                                                                                                                                                                                                              |                             |                                 |                                                                                                                                                                                                                                                                                                                                                                          | Review of the litteratue                   |
| D'Amico & Cardaci, 2003  | Mean age 13.4 years old (SD=1.1) | - Teachers rates (Linguistic-Literary, Logical-Mathematical, and Technical-Practical scores)                                                                                                                                                                 | $N = 151$                   |                                 | SE/Academic performance<br><br>—<br>n.s                                                                                                                                                                                                                                                                                                                                  | —                                          |
| Schmidt & Padilla, 2003  | Grades 10-12                     | self-reported Grades in school                                                                                                                                                                                                                               | $N = 330$                   |                                 | SE 10 <sup>th</sup> Grades/Aca Grades 10 <sup>th</sup> Grades, $r = .15, p < .01$<br>SE 12 <sup>th</sup> Grades/Aca Grades 10 <sup>th</sup> Grades, $r = .15, p < .01$<br>SE 10 <sup>th</sup> Grades/Aca Grades 12 <sup>th</sup> Grades, $NS$<br>SE 12 <sup>th</sup> Grades/Aca Grades 12 <sup>h</sup> Grades, $r = .17, p < .01$<br>From 2.25% to 2.89 % var. explained | —                                          |

| Articles                  | Age Range   | Sampling Methodology                                                                      | Sample Size<br>Gifted Group                                        | Sample Size<br>Non-Gifted Group                                    | Effect Size and % of<br>Variance Explained                                                                                                     | Methodological<br>Remarks                               |
|---------------------------|-------------|-------------------------------------------------------------------------------------------|--------------------------------------------------------------------|--------------------------------------------------------------------|------------------------------------------------------------------------------------------------------------------------------------------------|---------------------------------------------------------|
| Ross & Broh, 2000         | Grades 8-12 | Curriculum-based<br>achievement tests in<br>mathematics, science,<br>reading, and history | $N = 8802$                                                         |                                                                    | Covariance structure model:<br>academic achievement / SE<br>$r = .191$<br>3.65 % var. explained<br>SE does not significantly<br>improve Grades | —                                                       |
| Roznowski et al.,<br>2000 | Grade 10    | Longitudinal Study                                                                        | $n = 640$                                                          | $n = 10\,096$                                                      | Group / SE<br>Gifted group score ><br>Average group score                                                                                      | No information on<br>signiticativity or<br>effect size. |
| Faouri, 1998              | Grades 3-7  | Gifted program                                                                            | $n = 20$<br>including 10<br>students with<br>learning disabilities | $n = 20$<br>including 10 students<br>with learning<br>disabilities | Gifted group SE scores ><br>Control group SE scores,<br>$p = .028$                                                                             | —                                                       |
| Field et al., 1998        | Grades 5-9  | Gifted Program<br>IQ $\geq 132$                                                           | $n = 62$                                                           | $n = 162$                                                          | —<br>n.s                                                                                                                                       | —                                                       |

| Articles                          | Age Range  | Sampling Methodology                                                                                                                                            | Sample Size<br>Gifted Group | Sample Size<br>Non-Gifted Group | Effect Size and % of<br>Variance Explained                                                                                                                                                                                  | Methodological<br>Remarks                     |
|-----------------------------------|------------|-----------------------------------------------------------------------------------------------------------------------------------------------------------------|-----------------------------|---------------------------------|-----------------------------------------------------------------------------------------------------------------------------------------------------------------------------------------------------------------------------|-----------------------------------------------|
| Lea-Wood &<br>Clunies-Ross, 1995  | Grades 7-9 | Ability test and/or<br>nomination by teacher                                                                                                                    | $n = 81$                    | $n = 77$                        | Non-gifted girls obtained<br>higher Total Self-esteem means<br>$F(1,152) = 12.013, p = .001$<br>The difference between the<br>means of the giftedness groups<br>was negligible at year 7 but<br>was large at years 8 and 9. | Only girls were<br>included in the<br>sample. |
| Ball et al., 1994                 | 12 to 15   | IQ > 135                                                                                                                                                        | $n = 61$                    | $n = 122$                       | Group / SE<br>as a decision maker<br>$F(1,170) = 19.98, p < .001$                                                                                                                                                           | —                                             |
| Van Tassel-Baska<br>et al., 1994  | Grades 7-8 | IQ > 120,<br>> 95th percentile in either<br>mathematical or verbal<br>areas                                                                                     | $n = 147$                   | —                               | High SE among gifted students<br>> average score                                                                                                                                                                            | No control group.                             |
| Kulik & Kulik,<br>1992<br><br>(M) |            | 13 of the 56 studies<br>described effects of<br>grouping on student SE<br><br>Eleven of the 13 studies<br>also reported results<br>separately by ability level. |                             |                                 | average overall effect of<br>grouping: decrease self-esteem<br>scores by 0.03 SD<br><br>Effect sizes by ability level:<br>High: - .15<br>Medium: - .09<br>Low: .19                                                          | Unspecified<br>methodology.                   |

| Articles               | Age Range           | Sampling Methodology                                                                                                                                                                                                                 | Sample Size<br>Gifted Group | Sample Size<br>Non-Gifted Group                  | Effect Size and % of<br>Variance Explained                                                                                                                                                | Methodological<br>Remarks |
|------------------------|---------------------|--------------------------------------------------------------------------------------------------------------------------------------------------------------------------------------------------------------------------------------|-----------------------------|--------------------------------------------------|-------------------------------------------------------------------------------------------------------------------------------------------------------------------------------------------|---------------------------|
| Chiu, 1990             | Grades 4-5          | <ul style="list-style-type: none"> <li>- Otis-Lennon IQ score (from 115 to 148, average 129)</li> <li>- teacher nomination</li> <li>- Achievement test scores (Iowa Tests of Basic Skills) &gt; 95 th percentile or above</li> </ul> | $n = 136$                   | $n = 196$<br>$n = 118$ mild mentally handicapped | Main effect of Academic ability<br>$F(2,444) = 18.87, p < .01$<br>No difference between gifted and normal children Self-Esteem > mild mentally handicapped                                | —                         |
| Pearson & Beer, 1990   | Elementary children | <ul style="list-style-type: none"> <li>- intelligence scores at the 97th percentile</li> <li>- academic scores at the 95th percentile on individually administered tests</li> </ul>                                                  | $n = 38$                    | Normative data                                   | —<br>n.s                                                                                                                                                                                  | No control group.         |
| Alsaker, 1989          | Grades 6-9          | Grades in Norwegian, English and Mathematics                                                                                                                                                                                         |                             | $N = 2309$                                       | General SE/average Grades<br>$r$ from -.10 to -.30<br>from 1% to 9 % var. explained                                                                                                       | —                         |
| Rosenberg et al., 1989 | Grade 10            | School performance measured by student's self-reported Grades point average                                                                                                                                                          |                             | $N = 1886$                                       | Correlation SE/Grades between<br>$r = .24$ and $.25$<br>From 6.25% to 5.76 %<br>var. explained<br>Significant effect of Grades on<br>SE +.15. effect of SE on<br>Grades Ns ( $t = 1.90$ ) | All-boys sample.          |

| Articles                  | Age Range      | Sampling Methodology                                                                                                    | Sample Size Gifted Group                                       | Sample Size Non-Gifted Group                               | Effect Size and % of Variance Explained                                                                                                                  | Methodological Remarks   |
|---------------------------|----------------|-------------------------------------------------------------------------------------------------------------------------|----------------------------------------------------------------|------------------------------------------------------------|----------------------------------------------------------------------------------------------------------------------------------------------------------|--------------------------|
| Chan, 1988                | Grades 5-7     | - Gifted programs and teacher / parent nomination<br>- Raven's Progressive Matrices<br>- Test of learning ability       | $n = 117$                                                      | $n = 261$                                                  | $F(2,182) = 9.50, p < .0001$                                                                                                                             | —                        |
| Colangelo et al., 1987    | Grades 7-9     | - composite scores WISC,<br>- Iowa Test Basic Skills<br>- Grades point average                                          | $n = 61$                                                       | $n = 162$<br>$n = 20$ students with special learning needs | —<br>n.s                                                                                                                                                 | —                        |
| Cornell & Grossberg, 1987 | 7 to 11        | - Gifted program<br>- Wechsler or Stanford-Binet scale<br>mean 139.9 (SD 11.22)                                         | $n = 83$                                                       | Normative data                                             | Group / SE<br>$t$ value = 12.04, $p < .01$                                                                                                               | No control group.        |
| Bartell & Reynolds, 1986  | Grades 4-5     |                                                                                                                         | $n = 111$                                                      | $n = 34$                                                   | —<br>n.s                                                                                                                                                 | Unspecified methodology. |
| Brody & Benbow, 1986      | Grades 7 and 8 | Achievement<br>Highly Gifted:<br>SAT-M $\geq 700$<br>SAT-V $\geq 630$<br>Moderately Gifted:<br>SAT-M + SAT-V $\leq 540$ | Highly Gifted:<br>$n = 300$<br>Moderately Gifted:<br>$n = 111$ | —                                                          | Group / SE<br>n.s between gifted students and normative data<br>Highly gifted SE scores > Gifted SE scores<br>$f = .19, p < .01$<br>3.48% var. explained | No control group.        |

| Articles                              | Age Range                                                     | Sampling Methodology                                                                                                                                                                             | Sample Size<br>Gifted Group | Sample Size<br>Non-Gifted Group                                            | Effect Size and % of<br>Variance Explained                                               | Methodological<br>Remarks                                                            |
|---------------------------------------|---------------------------------------------------------------|--------------------------------------------------------------------------------------------------------------------------------------------------------------------------------------------------|-----------------------------|----------------------------------------------------------------------------|------------------------------------------------------------------------------------------|--------------------------------------------------------------------------------------|
| Hansford &<br>Hattie, 1982<br><br>(M) | School age                                                    | 128 studies                                                                                                                                                                                      | $N=202,823$                 |                                                                            | SE / Achievement<br>Average correlation .21<br>From -.77 to .96<br>4.41 % var. explained | Data base of 1,136<br>correlations.<br><br>No information<br>about age or<br>Grades. |
| McEwin &<br>Cross, 1982               | Grades 5-8                                                    | - IQ > 120 +<br><br>- teacher identification as<br>exhibiting outstanding<br>leadership and/or talent                                                                                            | $n = 115$                   | $n = 260$                                                                  | —<br>n.s                                                                                 | —                                                                                    |
| Winne et al.,<br>1982                 | Grades 4-7                                                    | - general ability as<br>reflected by the Peabody<br>Picture Vocabulary Test<br><br>- reading comprehension<br>subtest of the Canadian<br>Test of Basic Skills<br><br>- teachers' identification. | $n = 58$                    | $n = 60$ average<br>students<br><br>$n = 52$ learning<br>disabled students | —<br>n.s                                                                                 | —                                                                                    |
| Lehman & Edwins,<br>1981              | Grade 3<br><br>(and Grades 6<br>for the Non-<br>Gifted Group) | Gifted Program<br><br>$141 \leq IQ \leq 165$                                                                                                                                                     | $n = 16$                    | $n = 32$                                                                   | Gifted group SE scores ><br>Control group SE scores,<br>$p < .05$                        | Principals<br>nomination of<br>participants<br>included in the<br>non-gifted groups. |

| Articles               | Age Range            | Sampling Methodology                                                                                                                                                      | Sample Size<br>Gifted Group | Sample Size<br>Non-Gifted Group | Effect Size and % of<br>Variance Explained                                                                                                                                                | Methodological<br>Remarks |
|------------------------|----------------------|---------------------------------------------------------------------------------------------------------------------------------------------------------------------------|-----------------------------|---------------------------------|-------------------------------------------------------------------------------------------------------------------------------------------------------------------------------------------|---------------------------|
| Tidwell, 1980          | Grade 10<br>14 to 17 | - Identified by district<br>school psychologists as<br>gifted (to 2% of all<br>student)<br><br>Mean IQ: 136.99<br>(SD=15.25)                                              | $n = 1593$                  | Normative data                  | —<br>n.s                                                                                                                                                                                  | No control group.         |
| Dean, 1977             | Grades 7-8           | - Enrichment program<br>for the gifted<br><br>- Lorge-Thorndike<br>Intelligence test<br><br>IQ means:<br><br>147.9, sd = 13.4 for girls;<br><br>138.5, sd = 12.6 for boys | $n = 48$                    | Normative data                  | —<br>n.s                                                                                                                                                                                  | No control group.         |
| Lewis & Adank,<br>1975 | Grades 4-6           | -IQ scores from the SRA<br>Tests of General Ability<br><br>-Achievement with SAT                                                                                          | $N = 219$                   |                                 | IQ/SE<br>$r$ between .24 and .34,<br>$p < 0.05$<br>From 5.76% to 11.56 %<br>var. explained<br><br>SAT/SE<br>$r$ between .30 and .42,<br>$p < 0.01$<br>From 9% to 17,64%<br>var. explained | —                         |



| Articles               | Age Range                 | Sampling Methodology                                     | Sample Size<br>Gifted Group | Sample Size<br>Non-Gifted Group | Effect Size and % of<br>Variance Explained                                                                                                                                                               | Methodological<br>Remarks |
|------------------------|---------------------------|----------------------------------------------------------|-----------------------------|---------------------------------|----------------------------------------------------------------------------------------------------------------------------------------------------------------------------------------------------------|---------------------------|
| Simon & Simon,<br>1975 | Grade 5<br>10 to 12 years | - Verbal and nonverbal IQ<br>- SRA Achievement<br>Series |                             | $N = 87$                        | SE/Verbal IQ<br>$r = .0.30, p < .01$<br>9 % var. explained<br><br>SE/Non verbal IQ<br>$r = 0.23, p < .05$<br>5.29 % var. explained<br><br>SE/achievement<br>$r = .33, p < .01$<br>10.89 % var. explained | —                         |
| Coopersmith, 1967      |                           |                                                          |                             |                                 | SE/ intelligence<br>$r = .28, p < .05$<br>7.84 % var. explained<br><br>SE/ achievement<br>$r = .30, p < .05$<br>9 % var. explained                                                                       | —                         |

*Note.* — indicates that the information is not available in the article; (M) indicates that the study is a meta-analysis.

Table S11

*Summary table of methodological aspects and effect sizes from articles on humor.*

| Articles                    | Age Range                               | Sampling Methodology                                                                                        | Sample Size<br>Gifted Group | Sample Size<br>Non-Gifted Group | Effect Size and % of<br>Variance Explained                                                                                                                                                                | Methodological<br>Remarks                            |
|-----------------------------|-----------------------------------------|-------------------------------------------------------------------------------------------------------------|-----------------------------|---------------------------------|-----------------------------------------------------------------------------------------------------------------------------------------------------------------------------------------------------------|------------------------------------------------------|
| Bianchi et al.,<br>2017     | 12 - 15 years                           | 98th percentile<br>- WISC-IV<br>AND<br>- Progressive Matrices of<br>Raven                                   | $n = 23$                    | $n = 78$                        | - Irony Understanding<br>$d = .58, p = .011$<br>7.78 % var. explained<br><br>- Irony Production<br>$d = .66, p = 0.015$<br>9.80 % var. explained                                                          | —                                                    |
| Willinger et<br>al., 2017   | Mean age =<br>33.4 years<br>(SD = 11.9) | Verbal and Nonverbal<br>intelligence:<br><br>Vocabulary test and<br>Number-Connection-<br>Test respectively | $N = 156$                   |                                 | Black humor / intelligence<br><br>$NS$                                                                                                                                                                    |                                                      |
| Christensen et<br>al., 2016 | College Students                        | —                                                                                                           | $N = 270$                   |                                 | - Humor / g<br>$\beta = .51, p < .001$<br>26.01 % var. explained<br><br>- Humor / Gc<br>$r = .49, p < .001$<br>24.01 % var. explained<br><br>- Humor / Gf<br>$r = .22, p = .016$<br>4.84 % var. explained | Distinction between<br>Gf and Gc in the<br>analyses. |

| Articles                   | Age Range        | Sampling Methodology                                 | Sample Size<br>Gifted Group | Sample Size<br>Non-Gifted Group | Effect Size and % of<br>Variance Explained                                                                                                                                                                                                   | Methodological<br>Remarks                                        |
|----------------------------|------------------|------------------------------------------------------|-----------------------------|---------------------------------|----------------------------------------------------------------------------------------------------------------------------------------------------------------------------------------------------------------------------------------------|------------------------------------------------------------------|
| Kellner &<br>Benedek, 2016 | College Students | Mailing and<br>Announcements on<br>University Campus | $N = 151$                   |                                 | - Humor / Intelligence<br>$r = .30, p < .01$<br>9 % var. explained<br><br>- Humor / Gf<br>$r = .13$<br>$\beta = .00, p = .56$<br>1.69 % var. explained<br><br>- Humor / Gc<br>$r = .37$<br>$\beta = .29, p = .001$<br>13.69 % var. explained | Distinction between<br>Gf and Gc in the<br>analyses.             |
| Sharifi &<br>Sharifi, 2014 | Grades 10 - 12   | —                                                    | $n = 60$                    | $n = 60$                        | —                                                                                                                                                                                                                                            | Unspecified<br>methodology.<br><br>Only females<br>participants. |
| Vrticka et al.,<br>2013    | 6 - 13 years     | $94 \leq IQ \leq 140$ ,<br>mean IQ 121,6             | $N = 22$                    |                                 | —                                                                                                                                                                                                                                            | —                                                                |
| Bergen, 2009               | Grades 4 - 6     | —                                                    | $n = 74$                    | —                               | —                                                                                                                                                                                                                                            | Structured Interview<br>Method.<br><br>No control group.         |

| Articles                    | Age Range          | Sampling Methodology            | Sample Size<br>Gifted Group | Sample Size<br>Non-Gifted Group | Effect Size and % of<br>Variance Explained                  | Methodological<br>Remarks   |
|-----------------------------|--------------------|---------------------------------|-----------------------------|---------------------------------|-------------------------------------------------------------|-----------------------------|
| Shade, 1991                 | Grades 4, 6 and 8  | Gifted Program<br>IQ $\geq$ 130 | $n = 60$                    | $n = 60$                        | —                                                           | —                           |
| Ziv, 1990                   | Grade 8 - 12       | IQ $>$ 130                      | $n = 30$                    | $n = 62$                        | —                                                           | Unspecified<br>methodology. |
| Barnett &<br>Fiscella, 1985 | Preschool children | IQ $\geq$ 130                   | $n = 15$                    | $n = 20$                        | —<br>n.s                                                    | —                           |
| Hauck &<br>Thomas, 1972     | Grades 4 - 6       | $107 \leq \text{IQ} \leq 144$   | $N = 80$                    |                                 | Humor / IQ<br>$r = .91, p < .005$<br>82.81 % var. explained | Unspecified<br>methodology. |

*Note.* — indicates that the information is not available in the article; (M) indicates that the study is a meta-analysis.

Table S12

Summary table of methodological aspects and effect sizes from articles on interests.

| Articles                  | Age Range    | Sampling Methodology                                                             | Sample Size<br>Gifted Group | Sample Size<br>Non-Gifted Group | Effect Size and % of<br>Variance Explained                                                                                      | Methodological<br>Remarks |
|---------------------------|--------------|----------------------------------------------------------------------------------|-----------------------------|---------------------------------|---------------------------------------------------------------------------------------------------------------------------------|---------------------------|
| Roznowski et<br>al., 2000 | Grade 10     | Longitudinal Study                                                               | $n = 640$                   | $n = 10\,096$                   | Group / Hobby<br>$h = .30$<br>2.19 % var. explained<br>To<br>$h = .52$<br>6.35 % var. explained<br>4.62 % Median var. explained | —                         |
| Lehman &<br>Witty, 1927   | Grades 3 - 7 | Gifted Group:<br>$IQ \geq 140$<br><br>Non-Gifted Group:<br>$90 \leq IQ \leq 110$ | $n = 50$                    | $n = 50$                        | —                                                                                                                               | —                         |

Note. — indicates that the information is not available in the article; (M) indicates that the study is a meta-analysis.

Table S13

*Summary table of methodological aspects and effect sizes from articles on moral development.*

| Articles                         | Age Range                      | Sampling Methodology                   | Sample Size<br>Gifted Group | Sample Size<br>Non-Gifted Group | Effect Size and % of<br>Variance Explained                                                                                                                                                                                                                                                                                                                                     | Methodological<br>Remarks                                                                  |
|----------------------------------|--------------------------------|----------------------------------------|-----------------------------|---------------------------------|--------------------------------------------------------------------------------------------------------------------------------------------------------------------------------------------------------------------------------------------------------------------------------------------------------------------------------------------------------------------------------|--------------------------------------------------------------------------------------------|
| Lee et al.,<br>2020              | Junior High School<br>Students | Achievement                            | $n = 1\,062$                | $n = 614$                       | Groups / Social Purpose<br>$\eta^2 = .03, p < .001$<br>3 % var. explained                                                                                                                                                                                                                                                                                                      | Participants are<br>Korean and<br>American.<br><br>SES was controlled in<br>some analyses. |
| Beißert &<br>Hasselhorn,<br>2016 | 6 - 8 years                    | Gifted Program<br>- Teacher Nomination | $n = 62$                    | $n = 67$                        | - Correlation Intelligence /<br>Moral Reasoning<br>$r = .01, n.s$<br>0,01 % var. explained<br><br>To<br>$r = -.12, n.s$<br>1.44 % var. explained<br>0.52 % Median var. explained<br><br>- Intelligence as a Covariate<br>in Moral Reasoning<br>$\eta^2 = .00, n.s$<br>0 % var. explained<br><br>To<br>$\eta^2 = .02, n.s$<br>2 % var. explained<br>0.5 % Median var. explained | —                                                                                          |

| Articles                      | Age Range                             | Sampling Methodology                         | Sample Size<br>Gifted Group | Sample Size<br>Non-Gifted Group | Effect Size and % of<br>Variance Explained                                                                                                                                        | Methodological<br>Remarks |
|-------------------------------|---------------------------------------|----------------------------------------------|-----------------------------|---------------------------------|-----------------------------------------------------------------------------------------------------------------------------------------------------------------------------------|---------------------------|
| Alnabhan,<br>2011             | Grades 8 and 11                       | $\geq 90\%$ on Ravens<br>Matrices Test       | $n = 73$                    | $n = 159$                       | - Non-verbal IQ / Moral<br>Judgement<br>$\beta = .02$ , n.s<br>0.04 % var. explained<br><br>- Achievement / Moral<br>Judgement<br>$\beta = .10$ , n.s<br>1 % var. explained       | —                         |
| Derryberry &<br>Barger, 2008  | - Grades 7 – 10<br>- College Students | Achievement                                  | $n = 30$                    | $n = 30$                        | - Achievement / DIT<br>$r = .15$ , n.s<br>2.25 % var. explained<br><br>- Group / DIT<br>$\eta^2 = .29$ , 29 % var. explained<br>$d = 1.07$ , $p < .001$<br>22.28 % var. explained | —                         |
| Tiri &<br>Nokelainen,<br>2007 | Grades 7 - 9                          | Achievement<br>$8,5 \leq \text{GPA} \leq 10$ | $n = 130$                   | $n = 114$                       | —                                                                                                                                                                                 | —                         |

| Articles                              | Age Range                             | Sampling Methodology                                                                | Sample Size<br>Gifted Group | Sample Size<br>Non-Gifted Group | Effect Size and % of<br>Variance Explained                                                                                                                                                                                                                                                           | Methodological<br>Remarks                                                                          |
|---------------------------------------|---------------------------------------|-------------------------------------------------------------------------------------|-----------------------------|---------------------------------|------------------------------------------------------------------------------------------------------------------------------------------------------------------------------------------------------------------------------------------------------------------------------------------------------|----------------------------------------------------------------------------------------------------|
| Lee &<br>Olszewski-<br>Kubilius, 2006 | Grades 10 - 12                        | Summer Camp for Gifted<br>based on Achievement<br>(SAT)                             | $n = 234$                   | Normative data                  | - SAT / DIT<br>$r = -.05$ , n.s<br>0.25 % var. explained<br><br>To<br>$r = .06$ , n.s<br>0.36 % var. explained<br>0.36 % Median var. explained<br><br>- Group / DIT<br>$d = .04$ , n.s<br>0.04 % var. explained<br><br>To<br>$d = .50$ , n.s<br>5.9 % var. explained<br>0.30 % Median var. explained | No control group.<br><br>121 gifted<br>participants come<br>from the civic<br>leadership institue. |
| Derryberry et<br>al., 2005            | - Grades 7 – 10<br>- College Students | Gifted Program<br>- Achievement<br>(SAT-M and V > 500)                              | $n = 97$                    | $n = 140$                       | Group / DIT<br>$\eta^2 = .05$ , $p = .005$<br>5 % var. explained                                                                                                                                                                                                                                     | —                                                                                                  |
| Tiri &<br>Pehkonen,<br>2002           | Grades 8 and 9                        | After School Gifted<br>Program<br>- Teacher Nomination<br>- Ravens Matrices<br>Test | $n = 31$                    | Normative data                  | Raven Test / DIT<br>$r$ near 0<br>0 % var. explained                                                                                                                                                                                                                                                 | No control group.<br><br>The study is semi-<br>qualitative and based<br>in part on interviews.     |



| Articles                              | Age Range                      | Sampling Methodology                                           | Sample Size<br>Gifted Group                                                    | Sample Size<br>Non-Gifted Group | Effect Size and % of<br>Variance Explained                                                                                                  | Methodological<br>Remarks                                |
|---------------------------------------|--------------------------------|----------------------------------------------------------------|--------------------------------------------------------------------------------|---------------------------------|---------------------------------------------------------------------------------------------------------------------------------------------|----------------------------------------------------------|
| Howard-<br>Hamilton &<br>Franks, 1995 | Senior High School<br>Students | Summer Camp for Gifted<br>and Talented based on<br>Achievement | $n = 167$                                                                      | Normative data                  | —                                                                                                                                           | —                                                        |
| Chovan &<br>Freeman, 1993             | Grades 5, 8 and 10             | —                                                              | $n = 51$                                                                       | $n = 50$                        | —                                                                                                                                           | Unspecified<br>methodology.                              |
| Narvaez, 1993                         | Grade 8                        | Achievement                                                    | Private Preparatory<br>School:<br>$n = 69$<br><br>Suburban School:<br>$n = 53$ | —                               | Scholastic Scores / DIT<br>$r = .28$<br>7.84 % var. explained<br>To<br>$r = .36$<br>12.96 % var. explained<br>10.93 % Median var. explained | No control group.<br><br>Mostly descriptive<br>analyses. |
| Simmons &<br>Zumpf, 1986              | 4 - 7 years                    | Intelligence Test                                              | $n = 38$                                                                       | Normative data                  | —                                                                                                                                           | No control group.                                        |
| Tan-Willman<br>& Gutteridge,<br>1981  | Secondary School<br>Students   | - Acceleration<br>Program<br>- Academic<br>Achievement         | $n = 115$                                                                      | Empirical studies               | —                                                                                                                                           | No control group.<br><br>Unspecified<br>methodology.     |

| Articles                | Age Range    | Sampling Methodology              | Sample Size<br>Gifted Group | Sample Size<br>Non-Gifted Group | Effect Size and % of<br>Variance Explained                                                                                                                            | Methodological<br>Remarks |
|-------------------------|--------------|-----------------------------------|-----------------------------|---------------------------------|-----------------------------------------------------------------------------------------------------------------------------------------------------------------------|---------------------------|
| Karnes &<br>Brown, 1980 | Grades 5 - 9 | Gifted Program<br>- IQ $\geq$ 120 | $n = 233$                   | —                               | - Intelligence Measures /<br>DIT<br>$r = -.06$ , n.s<br>0.36 % var. explained<br>To<br>$r = .31$ , $p < .01$<br>9.61 % var. explained<br>4.10 % Median var. explained | No control group.         |
| Kohlberg,<br>1964       | —            | —                                 | —                           | —                               | IQ / moral judgement<br>$r = .31$<br>9.61 % var. explained                                                                                                            | —                         |

*Note.* — indicates that the information is not available in the article; (M) indicates that the study is a meta-analysis.

Table S14

*Summary table of methodological aspects and effect sizes from articles on leadership.*

| Articles                    | Age Range          | Sampling Methodology                                                                                          | Sample Size<br>Gifted Group | Sample Size<br>Non-Gifted Group | Effect Size and % of<br>Variance Explained                                                                                                                                             | Methodological<br>Remarks                                                                             |
|-----------------------------|--------------------|---------------------------------------------------------------------------------------------------------------|-----------------------------|---------------------------------|----------------------------------------------------------------------------------------------------------------------------------------------------------------------------------------|-------------------------------------------------------------------------------------------------------|
| Lee et al.,<br>2020         | Secondary Students | <ul style="list-style-type: none"> <li>- Academic achievement</li> <li>- Talent development center</li> </ul> | $n = 440$                   | $n = 303$                       | - Group / Type of leadership<br>$r = .15, p = .001$<br>2.25 % var. explained<br><br>- Group / Leader's ability<br>$r = .24, p < .001$<br>5.76 % var. explained                         | Participants are Korean and American adolescents.<br><br>The design includes a focus group interview. |
| Peairs et al.,<br>2019      | Grade 7            | Achievement                                                                                                   | $n = 202$                   | $n = 272$                       | —                                                                                                                                                                                      | —                                                                                                     |
| Muammar,<br>2015            | College Students   | Ability Test<br>$GAT \geq 80$                                                                                 | $n = 56$                    | $n = 120$                       | Group / Planning skills<br>$d = .31, p = .04$<br>2.34 % var. explained                                                                                                                 | —                                                                                                     |
| Hoffman et al., 2011<br>(M) | —                  | 187 Studies                                                                                                   | $N = 146\,851$              |                                 | - Leader Effectiveness / Cognitive Abilities<br>$\rho = .17$<br>2.89 % var. explained<br><br>- Leader Effectiveness / Problem-Solving Skills<br>$\rho = .39$<br>15.21 % var. explained | —                                                                                                     |

| Articles                              | Age Range      | Sampling Methodology                                           | Sample Size<br>Gifted Group | Sample Size<br>Non-Gifted Group | Effect Size and % of<br>Variance Explained                                                                                                                                                                                 | Methodological<br>Remarks                                                                                                                                            |
|---------------------------------------|----------------|----------------------------------------------------------------|-----------------------------|---------------------------------|----------------------------------------------------------------------------------------------------------------------------------------------------------------------------------------------------------------------------|----------------------------------------------------------------------------------------------------------------------------------------------------------------------|
| Mills, 2009<br>(M)                    | —              | 48 Studies                                                     | $N = 7\,343$                |                                 | Leadership / Emotional<br>Intelligence<br>Combined Effect $r = .38$ ,<br>with $r$ ranging from .00 to .90<br>14.44 % var. explained                                                                                        | Unpublished<br>dissertations (48%)<br>and theses (8%) were<br>included in the meta<br>analysis.<br><br>Lack of information<br>regarding ages of the<br>participants. |
| Lee &<br>Olszewski-<br>Kubilius, 2006 | Grades 10 - 12 | Summer Program for the<br>Gifted based on<br>Achievement (SAT) | $n = 234$                   | Normative data                  | - SAT-M / Leadership<br>$r = -.19, p = .05$<br>3.61 % var. explained<br><br>- SAT-Combined /<br>Leadership<br>$r = -.20, p = .04$<br>4 % var. explained<br><br>- Group / Leadership<br>$d = .67$<br>10.11 % var. explained | No control group.<br><br>121 gifted<br>participants come<br>from the civic<br>leadership institute.                                                                  |

| Articles                     | Age Range                         | Sampling Methodology | Sample Size<br>Gifted Group | Sample Size<br>Non-Gifted Group | Effect Size and % of<br>Variance Explained                                                                                                                                                                                                                                         | Methodological<br>Remarks |
|------------------------------|-----------------------------------|----------------------|-----------------------------|---------------------------------|------------------------------------------------------------------------------------------------------------------------------------------------------------------------------------------------------------------------------------------------------------------------------------|---------------------------|
| Judge et al.,<br>2004<br>(M) | —                                 | 151 Studies          | $N = 40\,652$               |                                 | - Leadership / Intelligence<br>Average $r = .17$<br>2.89 % var. explained<br><br>- Leadership / Perceived<br>Assessments of Intelligence<br>$k$ -weighted average of .60<br><br>- Leadership / Pencil-and-<br>Paper Assessments of<br>Intelligence<br>$k$ -weighted average of .18 | —                         |
| Lord et al.,<br>1986<br>(M)  | High School<br>Students to Adults | 18 Studies           | $N = 2\,239$                |                                 | Intelligence / Leadership<br>Corrected $r = .50$<br>25 % var. explained                                                                                                                                                                                                            | —                         |

*Note.* — indicates that the information is not available in the article; (M) indicates that the study is a meta-analysis.

Table S15

*Summary table of methodological aspects and effect sizes from articles on emotional intelligence trait.*

| Articles                     | Age Range          | Sampling Methodology                                                                            | Sample Size<br>Gifted Group | Sample Size<br>Non-Gifted Group | Effect Size and % of<br>Variance Explained                                                                                                                                                              | Methodological<br>Remarks                    |
|------------------------------|--------------------|-------------------------------------------------------------------------------------------------|-----------------------------|---------------------------------|---------------------------------------------------------------------------------------------------------------------------------------------------------------------------------------------------------|----------------------------------------------|
| MacCann et al., 2020         |                    |                                                                                                 |                             |                                 |                                                                                                                                                                                                         |                                              |
| (M)                          | Children to Adults | 162 Studies<br>Academic Performance                                                             | —                           | —                               | - EI Self-rated Measures /<br>Academic Performance<br>$r = .10, p < .001$<br>1.44 % var. explained<br><br>- EI Mixed Measures /<br>Academic Performance<br>$r = .13, p < .001$<br>3.61 % var. explained | All studies included<br>report effect sizes. |
| Sánchez-Álvarez et al., 2020 |                    |                                                                                                 |                             |                                 |                                                                                                                                                                                                         |                                              |
| (M)                          | Secondary Students | 44 Studies<br>Academic Performance                                                              | $N = 19\,861$               |                                 | - EI Self-rated Measures /<br>Academic Performance<br>$r = .26$<br>6.76 % var. explained<br><br>- EI Mixed Measures /<br>Academic Performance<br>$r = .24$<br>5.76 % var. explained                     | —                                            |
| Li & Shi, 2019               |                    |                                                                                                 |                             |                                 |                                                                                                                                                                                                         |                                              |
|                              | 8 to 11 years old  | - Gifted program<br>- Stanford-Binet,<br>Wechsler<br>- Raven's Standard<br>Progressive Matrices | $n = 80$                    | $n = 104$                       | Gifted EI scores / Control<br>group EI scores,<br>$NS$<br><br>RSPM / EI in gifted group<br>$r = -.18$<br><br>RSPM / EI in control group<br>$r = .07$                                                    | —                                            |

| Articles                                  | Age Range                   | Sampling Methodology                                                             | Sample Size<br>Gifted Group | Sample Size<br>Non-Gifted Group | Effect Size and % of<br>Variance Explained                                                                                                                                              | Methodological<br>Remarks                                                                          |
|-------------------------------------------|-----------------------------|----------------------------------------------------------------------------------|-----------------------------|---------------------------------|-----------------------------------------------------------------------------------------------------------------------------------------------------------------------------------------|----------------------------------------------------------------------------------------------------|
| Li et al., 2017                           | 7 - 11 years                | Gifted Program<br>33 ≤ IQ ≤ 43 on Cattell's<br>Culture Fair Intelligence<br>Test | <i>n</i> = 98               | <i>n</i> = 125                  | - EI Score / Gifted Group<br><i>r</i> = .22, <i>p</i> < .05<br>4.84 % var. explained<br><br>- EI Score / Non-Gifted<br>Group<br><i>r</i> = .28, <i>p</i> < .01<br>7.84 % var. explained | —                                                                                                  |
| Perera &<br>DiGiacomo,<br>2013<br><br>(M) | Children to<br>Young Adults | 40 Studies<br><br>Academic Performance                                           |                             | <i>N</i> = 10 292               | EI / Academic Performance<br>Summary effect <i>r</i> = .20<br>4 % var. explained                                                                                                        | 12 unpublished<br>dissertations were<br>included in the meta-<br>analysis.                         |
| Brasseur &<br>Grégoire,<br>2010           | 11 - 19 years               | Clinical Population<br>- IQ > 125<br>OR<br>- Verbal IQ > 130                     | <i>n</i> = 90               | <i>n</i> = 90                   | - EI / Academic Achievement<br><i>R</i> <sup>2</sup> adjusted = .07, <i>p</i> < .00<br>7.92 % var. explained<br><br>- EI / Group<br><br>—<br>n.s                                        | —                                                                                                  |
| Lee &<br>Olszewski-<br>Kubilus, 2006      | Grades 10 - 12              | Summer Program for the<br>Gifted based on<br>Achievement (SAT)                   | <i>n</i> = 234              | Normative data                  | EI Score / Group<br>- Males<br><i>d</i> = - .12, n.s<br>0.36 % var. explained<br>- Females<br><i>d</i> = - .42, <i>p</i> = .00<br>4.24 % var. explained                                 | No control group.<br><br>121 gifted<br>participants come<br>from the civic<br>leadership institue. |

| Articles                      | Age Range     | - Sampling Methodology                                 | Sample Size Gifted Group | Sample Size Non-Gifted Group | Effect Size and % of Variance Explained | Methodological Remarks |
|-------------------------------|---------------|--------------------------------------------------------|--------------------------|------------------------------|-----------------------------------------|------------------------|
| Schwean et al., 2006          | Grades 4 – 8  | - Gifted Program<br>- Regular Classes<br>IQ $\geq$ 130 | $n = 169$                | $n = 1200$                   | —                                       | —                      |
| Corso, 2001<br>Masters thesis | 12 - 16 years | Summer Program for the Gifted based on Achievement     | $n = 100$                | Normative data               | —                                       | No control group.      |

*Note.* — indicates that the information is not available in the article; (M) indicates that the study is a meta-analysis.



Table S16

*Summary table of methodological aspects and effect sizes from articles on emotional intelligence ability.*

| Articles                                       | Age Range     | Sampling Methodology                                  | Sample Size<br>Gifted Group | Sample Size<br>Non-Gifted Group | Effect Size and % of<br>Variance Explained                                                                                                                                                                                                                                                                                                                                   | Methodological<br>Remarks                                                                                                                                                                  |
|------------------------------------------------|---------------|-------------------------------------------------------|-----------------------------|---------------------------------|------------------------------------------------------------------------------------------------------------------------------------------------------------------------------------------------------------------------------------------------------------------------------------------------------------------------------------------------------------------------------|--------------------------------------------------------------------------------------------------------------------------------------------------------------------------------------------|
| Perpiña Martí<br>et al., 2023                  | 8-11 years    | Academic achievement<br>(language and<br>mathematics) | $N = 173$                   |                                 | Academic achievement in<br>mathematics / EI score<br>$r = .188$<br>Academic achievement in<br>language / EI score<br>$r = .043$                                                                                                                                                                                                                                              | —                                                                                                                                                                                          |
| Abdulla<br>Alabbasi et<br>al., 2020<br><br>(M) | Grades 4 - 12 | 21 Studies Involving<br>Gifted Participants           | $N = 15\,455$               | $N = 27\,464$                   | - EI Level Mean Effect Size<br>/ Group<br>$g = .23, p < .001$<br>1.30 % var. explained<br><br>- EI Ability Measures<br>(MSCEIT) / Group<br>$g = .43, p < .001$<br>4.41 % var. explained<br><br>- EI Trait Measures (EQ-i)<br>/ Group<br>$g = .22, p < .001$<br>1.19 % var. explained<br><br>- EI Trait Measures (SSEIT)<br>/ Group<br>$g = -.015, n.s$<br>0 % var. explained | Dissertation, theses<br>(4) and conference<br>proceeding (2) were<br>included in the meta<br>analysis.<br><br>No control of the<br>dependency of<br>multiple effect sizes<br>within study. |

| Articles                                       | Age Range               | Sampling Methodology                                                         | Sample Size<br>Gifted Group | Sample Size<br>Non-Gifted Group | Effect Size and % of<br>Variance Explained                                                                                                                                                                                                                        | Methodological<br>Remarks                    |
|------------------------------------------------|-------------------------|------------------------------------------------------------------------------|-----------------------------|---------------------------------|-------------------------------------------------------------------------------------------------------------------------------------------------------------------------------------------------------------------------------------------------------------------|----------------------------------------------|
| MacCann et<br>al., 2020<br><br>(M)             | Children to Adults      | 162 Studies<br><br>Academic Performance                                      | —                           | —                               | EI Ability / Academic<br>Performance<br>$r = .16, p < .001$<br>2.56 % var. explained                                                                                                                                                                              | All studies included<br>report effect sizes. |
| Ogurlu, 2020<br><br>(M)                        | Grade 1 to<br>Adulthood | 16 Studies,<br>Including 11 Studies<br>focus on Children and<br>Adolescents. | —                           | —                               | - EI Level Overall Effect<br>Size / Group<br>$g = .12, p = .02$<br>0.36 % var. explained<br><br>- EI Ability Measures /<br>Group<br>$g = .33, p = .05$<br>2.66 % var. explained<br><br>- EI Trait Measures / Group<br>$g = .04, p = .47$<br>0.04 % var. explained | —                                            |
| Sánchez-<br>Álvarez et al.,<br>2020<br><br>(M) | Secondary Students      | 44 Studies<br><br>Academic Performance                                       |                             | $N = 19\,861$                   | EI Ability / Academic<br>Performance<br>$r = .31$<br>9 % var. explained                                                                                                                                                                                           | —                                            |

| Articles                   | Age Range      | Sampling Methodology                         | Sample Size<br>Gifted Group              | Sample Size<br>Non-Gifted Group                                                                                                                                                                                                                                                                          | Effect Size and % of<br>Variance Explained                                                             |
|----------------------------|----------------|----------------------------------------------|------------------------------------------|----------------------------------------------------------------------------------------------------------------------------------------------------------------------------------------------------------------------------------------------------------------------------------------------------------|--------------------------------------------------------------------------------------------------------|
| Kong, 2014                 |                |                                              |                                          |                                                                                                                                                                                                                                                                                                          |                                                                                                        |
| (M)                        |                | 46 Studies                                   | - Intelligence Measures:<br>$N = 7\,945$ | Focus on Intelligence Measures                                                                                                                                                                                                                                                                           |                                                                                                        |
|                            | —              | - Intelligence Measures<br>- Admission Tests | - Admission Tests:<br>$N = 3039$         | - EI Ability Measures /<br>General Intelligence<br>$r$ corrected = .33<br>10.89 % var. explained<br>- EI Ability Measures /<br>Verbal Intelligence<br>$r$ corrected = .26<br>6.76 % var. explained<br>- EI Ability Measures /<br>Non-Verbal Intelligence<br>$r$ corrected = .27<br>7.29 % var. explained | The authors<br>distinguished between<br>test-based measures<br>of intelligence and<br>admission tests. |
| Sharifi &<br>Sharifi, 2014 | Grades 10 - 12 | —                                            | $n = 60$                                 | $n = 60$                                                                                                                                                                                                                                                                                                 | Unspecified<br>methodology.<br><br>Only females<br>participants.                                       |

| Articles                       | Age Range       | Sampling Methodology                                                       | Sample Size<br>Gifted Group | Sample Size<br>Non-Gifted Group | Effect Size and % of<br>Variance Explained                                                                                                                                                                                                                                                                                                                          | Methodological<br>Remarks                                                          |
|--------------------------------|-----------------|----------------------------------------------------------------------------|-----------------------------|---------------------------------|---------------------------------------------------------------------------------------------------------------------------------------------------------------------------------------------------------------------------------------------------------------------------------------------------------------------------------------------------------------------|------------------------------------------------------------------------------------|
| Zeidner et al.,<br>2005        | Grades 7 - 10   | Gifted Program<br>- Academic achievement<br>- Cognitive Ability Assessment | $n = 83$                    | $n = 125$                       | - EI Ability Measures / Group<br>$d = .39, p < .05$<br>3.65 % var. explained<br><br>- EI Trait Measures / Group<br>$d = -.57, p < .05$<br>7.51 % var. explained<br><br>- EI Ability Measures / Verbal Competencies<br>$r = .32, p < .01$<br>10.24 % var. explained<br><br>- EI Trait Measures / Verbal Competencies<br>$r = -.21, p < .01$<br>4.41 % var. explained | Participants' vocabulary levels were check.                                        |
| Wojtaszewski & Aalsma,<br>2004 | Grade 11 and 12 | Gifted Program                                                             | $n = 39$                    | Normative data                  | - EI Ability Measures / Cognitive Abilities<br>$r = -.03$<br>0.09 % var. explained<br><br>- EI Ability Measures / Academic Achievement<br>$r = .37, p < .05$<br>13.69 % var. explained                                                                                                                                                                              | Wide heterogeneity in GPA scores within the gifted group.<br><br>No control group. |

| Articles           | Age Range     | - Sampling Methodology                                   | Sample Size Gifted Group | Sample Size Non-Gifted Group | Effect Size and % of Variance Explained | Methodological Remarks                                                                      |
|--------------------|---------------|----------------------------------------------------------|--------------------------|------------------------------|-----------------------------------------|---------------------------------------------------------------------------------------------|
| Mayer et al., 2001 | 13 - 17 years | - Summer Program for Gifted<br>- Relatives to one author | N = 11                   | —                            | —                                       | Qualitative study with no control group.<br><br>Only verbal intelligence has been assessed. |

*Note.* — indicates that the information is not available in the article; (M) indicates that the study is a meta-analysis.

Table S17

*Summary table of methodological aspects and effect sizes from articles on over-excitabilities.*

| Articles                      | Age Range     | Sampling Methodology                       | Sample Size Gifted Group | Sample Size Non-Gifted Group | Effect Size and % of Variance Explained                                                                                                                                                                      | Methodological Remarks                 |
|-------------------------------|---------------|--------------------------------------------|--------------------------|------------------------------|--------------------------------------------------------------------------------------------------------------------------------------------------------------------------------------------------------------|----------------------------------------|
| Winkler & Voight, 2016<br>(M) | —             | 12 Studies<br>Intellectual Giftedness Only | <i>N</i> from 79 to 486  |                              | Group / Type of OE<br>Overall Weighted Mean Effect Size = .17, n.s<br>0.72 % var. explained<br>To<br>Overall Weighted Mean ES = .55, <i>p</i> < .05<br>7.02 % var. explained<br>1.19 % Median var. explained | All studies included control groups.   |
| Alias et al., 2013            | 10 - 15 years | Summer Program for the Gifted              | <i>n</i> = 335           | —                            | —                                                                                                                                                                                                            | No control Group.<br>No data analyses. |
| Rinn et al., 2010             | 11 - 16 years | Summer Program for the Gifted<br>IQ ≥ 125  | <i>n</i> = 379           | —                            | —                                                                                                                                                                                                            | No control group.                      |
| Gross et al., 2007            | Grades 6 - 10 | Summer Program for the Gifted<br>IQ ≥ 125  | <i>n</i> = 248           | —                            | Grade Level / Type of OE<br><i>r</i> = - .03, n.s<br>0.09 % var. explained<br>To<br><i>r</i> = .22, <i>p</i> < .01<br>4.84 % var. explained<br>1 % Median var. explained                                     | No control group.                      |

| Articles          | Age Range    | Sampling Methodology | Sample Size<br>Gifted Group | Sample Size<br>Non-Gifted Group | Effect Size and % of<br>Variance Explained                                                                                                                                                                                                                                                                                                                                                                                                                | Methodological<br>Remarks   |
|-------------------|--------------|----------------------|-----------------------------|---------------------------------|-----------------------------------------------------------------------------------------------------------------------------------------------------------------------------------------------------------------------------------------------------------------------------------------------------------------------------------------------------------------------------------------------------------------------------------------------------------|-----------------------------|
| Tieso, 2007       | 7 - 15 years | Academic Achievement | $n = 296$                   | $n = 184$                       | Gender / OE subscales<br>- Gifted Group<br>Partial $\eta^2 = .19, p < .001$<br>19 % var. explained<br>- Non-Gifted Group<br>Partial $\eta^2 = .24, p < .001$<br>24 % var. explained                                                                                                                                                                                                                                                                       | —                           |
| Bouchard,<br>2004 | 4 - 12 years | —                    | $n = 96$                    | $n = 75$                        | - Psychomotor OE Score /<br>Group<br>$\eta^2 = .037, p = .012$<br>3.67 % var. explained<br>- Sensual OE Score / Group<br>$\eta^2 = .008, p = .247$<br>0.8 % var. explained<br>- Imaginational OE Score /<br>Group<br>$\eta^2 = .011, p = .165$<br>1.1 % var. explained<br>- Intellectual OE Score /<br>Group<br>$\eta^2 = .119, p < .01$<br>11.9 % var. explained<br>- Emotional OE Score /<br>Group<br>$\eta^2 = .002, p = .546$<br>0.2 % var. explained | Unspecified<br>methodology. |

| Articles             | Age Range        | Sampling Methodology                                                                                  | Sample Size Gifted Group                                                                                                                               | Sample Size Non-Gifted Group | Effect Size and % of Variance Explained | Methodological Remarks |
|----------------------|------------------|-------------------------------------------------------------------------------------------------------|--------------------------------------------------------------------------------------------------------------------------------------------------------|------------------------------|-----------------------------------------|------------------------|
| Bouchet & Falk, 2001 | College Students | <ul style="list-style-type: none"><li>- Gifted Program</li><li>- Advanced Placement Classes</li></ul> | $N = 273$<br><ul style="list-style-type: none"><li>- Gifted Program: <math>n = 142</math></li><li>- Advanced Placement: <math>n = 131</math></li></ul> | $n = 288$                    | —                                       | —                      |

*Note.* — indicates that the information is not available in the article; (M) indicates that the study is a meta-analysis.
